# Supplementary material for: Chemoselective arylation of phenols with bromo-nitroarenes: synthesis of nitro-biaryl-ols and their conversion into benzofurans and carbazoles
Source: Royal Society of Chemistry journal article supplement (doi:10.1039/c4cc03090g), 2014-01-01

# **Chemoselective Arylation of Phenols with Bromo-nitroarenes: Synthesis of Nitro-biaryl-ols and Their Conversion into Benzofurans and Carbazoles**

Amit Kumar, Abhimanyu Yadav, Ajay Verma, Sadhan Jana, Mohammad Sattar, Shailesh Kumar, Ch. Durga Prasad and Sangit Kumar\*

Department of Chemistry, Indian Institute of Science Education and Research (IISER) Bhopal,  
Indore By-pass Road, Bhauri, Bhopal, Madhya Pradesh, India-462 066

## **Content**

HRMS Spectrum

S2-S42

# Display Report

## Analysis Info

Analysis Name D:\Data\user data\2013\NOV\29 nov\Dr.S.Kumar-AY-67-II\_1-A,4\_01\_1600.d  
Method HRLCMS-6 FEB.m  
Sample Name Dr.S.Kumar-AY-67-II  
Comment

Acquisition Date 11/29/2013 12:47:40 PM  
Operator Amit  
Instrument micrOTOF-Q II 10330

## Acquisition Parameter

|             |          |                       |           |                  |           |
|-------------|----------|-----------------------|-----------|------------------|-----------|
| Source Type | ESI      | Ion Polarity          | Negative  | Set Nebulizer    | 1.2 Bar   |
| Focus       | Active   | Set Capillary         | 2500 V    | Set Dry Heater   | 200 °C    |
| Scan Begin  | 50 m/z   | Set End Plate Offset  | -500 V    | Set Dry Gas      | 7.0 l/min |
| Scan End    | 3000 m/z | Set Collision Cell RF | 130.0 Vpp | Set Divert Valve | Waste     |

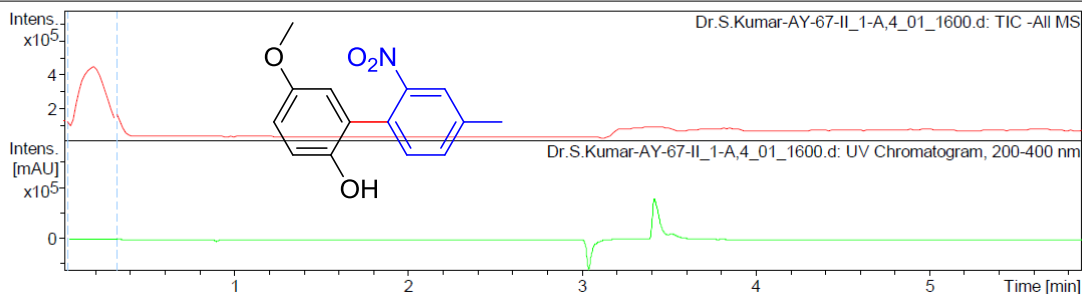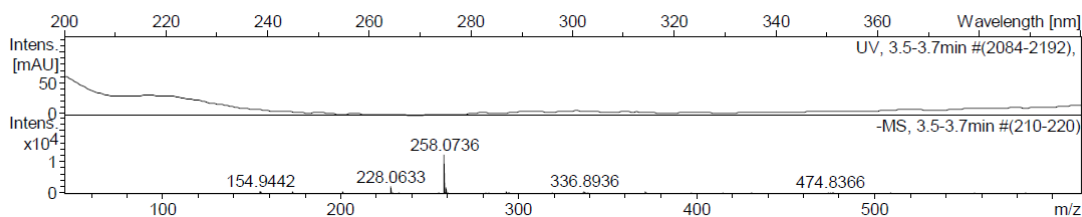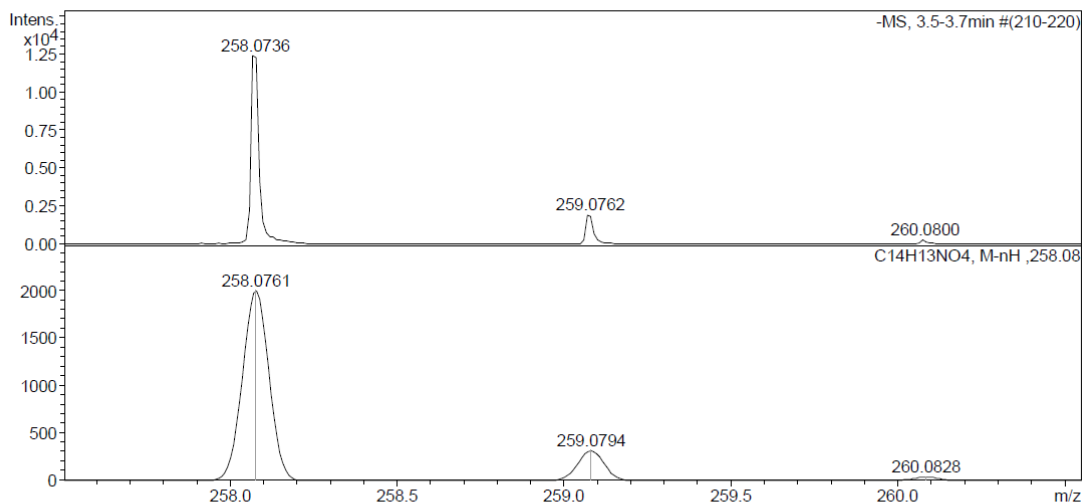

# Display Report

## Analysis Info

Analysis Name D:\Data\user data\2013\NOV\27 NOV\Dr.S.Kumar-AY-62-II\_1-A,7\_01\_1563.d  
Method HRLCMS-6 FEB.m  
Sample Name Dr.S.Kumar-AY-62-II  
Comment

Acquisition Date 11/27/2013 12:08:15 PM  
Operator Amit  
Instrument micrOTOF-Q II 10330

## Acquisition Parameter

|             |          |                       |           |                  |           |
|-------------|----------|-----------------------|-----------|------------------|-----------|
| Source Type | ESI      | Ion Polarity          | Negative  | Set Nebulizer    | 1.2 Bar   |
| Focus       | Active   | Set Capillary         | 2500 V    | Set Dry Heater   | 200 °C    |
| Scan Begin  | 50 m/z   | Set End Plate Offset  | -500 V    | Set Dry Gas      | 7.0 l/min |
| Scan End    | 3000 m/z | Set Collision Cell RF | 130.0 Vpp | Set Divert Valve | Waste     |

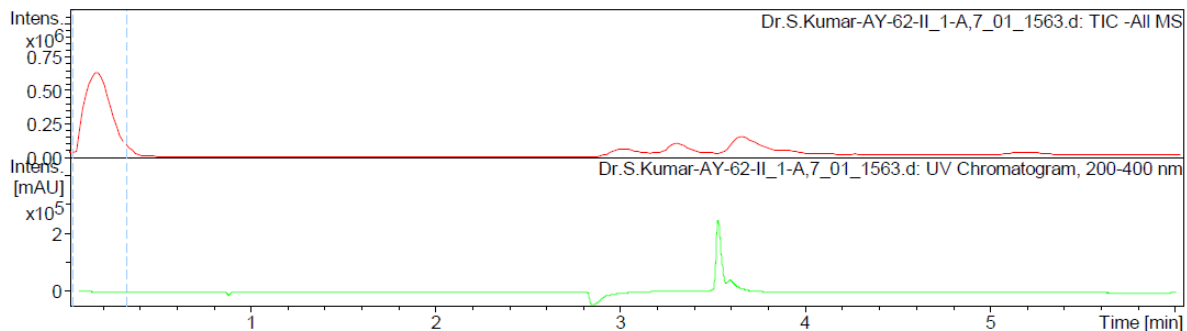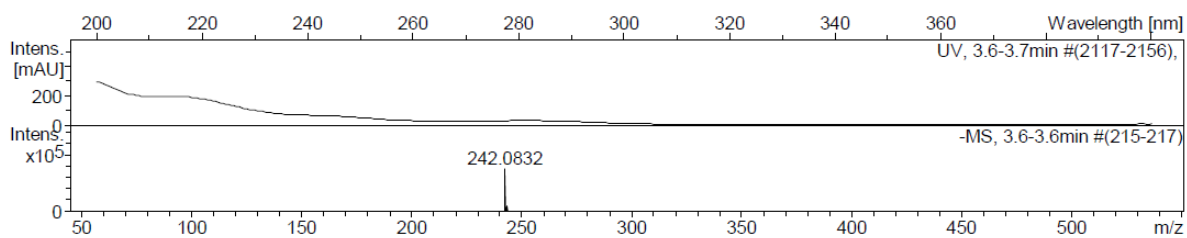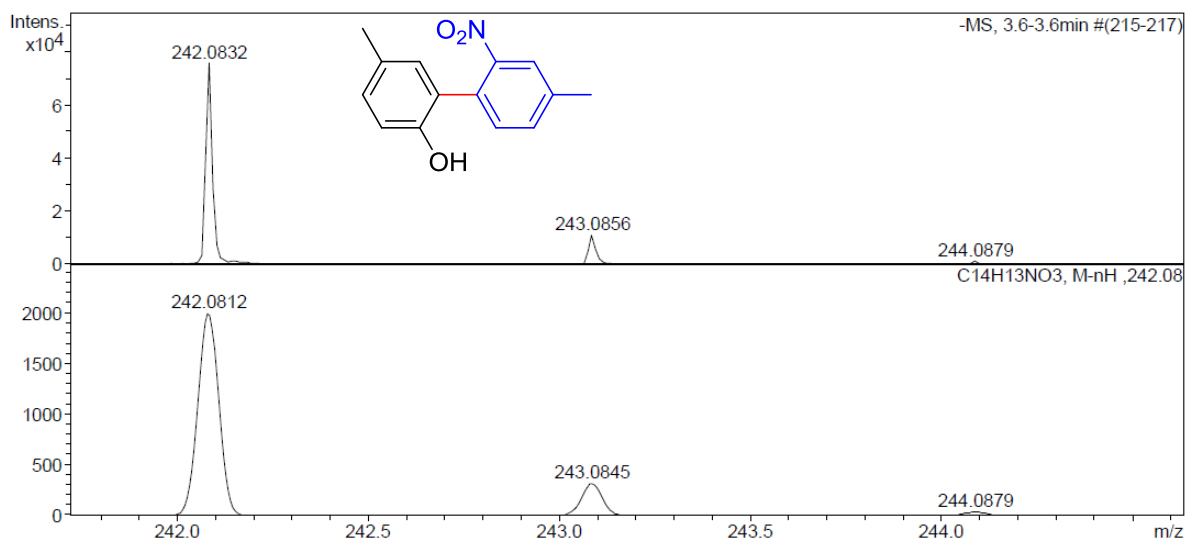

# Display Report

## Analysis Info

Analysis Name D:\Data\user data\2013\DEC\27 dec\Dr.S.Kumar-AK-4-28R.d  
Method tune\_low.m  
Sample Name AK-4-28R  
Comment

Acquisition Date 12/27/2013 12:42:41 PM  
Operator Amit  
Instrument micrOTOF-Q II 10330

## Acquisition Parameter

|             |            |                       |           |                  |           |
|-------------|------------|-----------------------|-----------|------------------|-----------|
| Source Type | APCI       | Ion Polarity          | Positive  | Set Nebulizer    | 1.6 Bar   |
| Focus       | Not active | Set Capillary         | 4500 V    | Set Dry Heater   | 200 °C    |
| Scan Begin  | 50 m/z     | Set End Plate Offset  | -500 V    | Set Dry Gas      | 8.0 l/min |
| Scan End    | 3000 m/z   | Set Collision Cell RF | 130.0 Vpp | Set Divert Valve | Waste     |

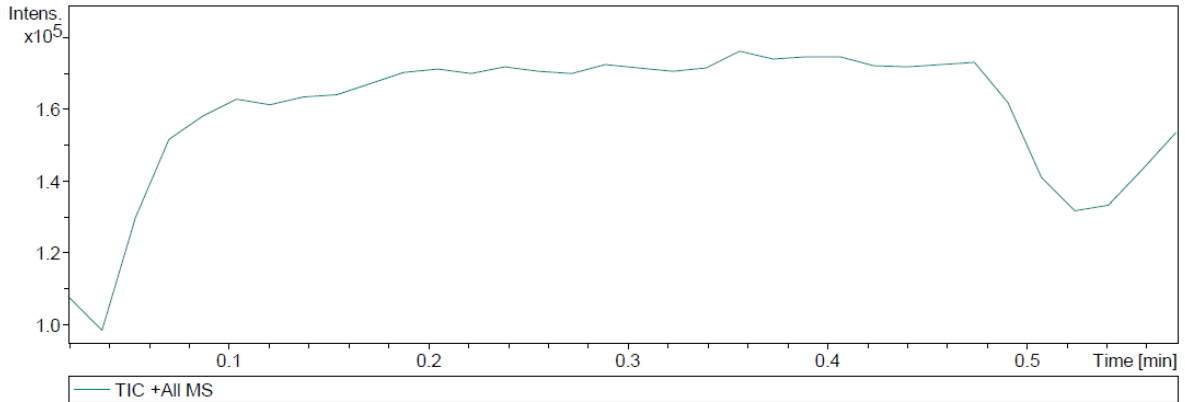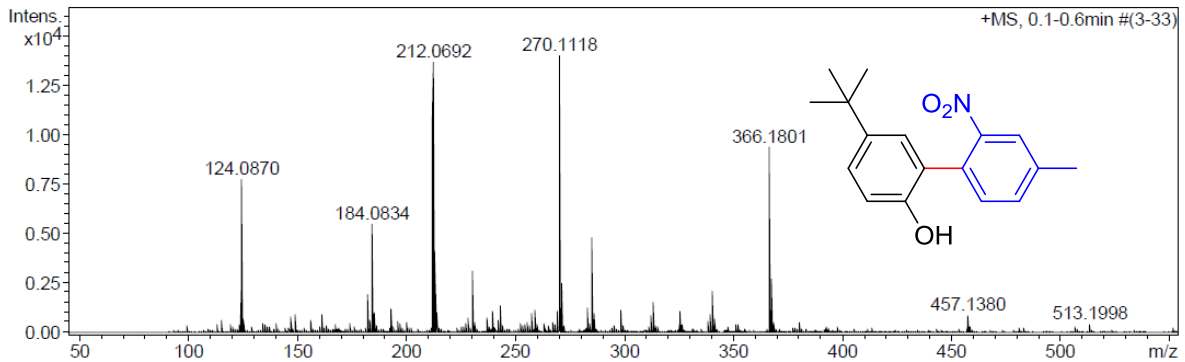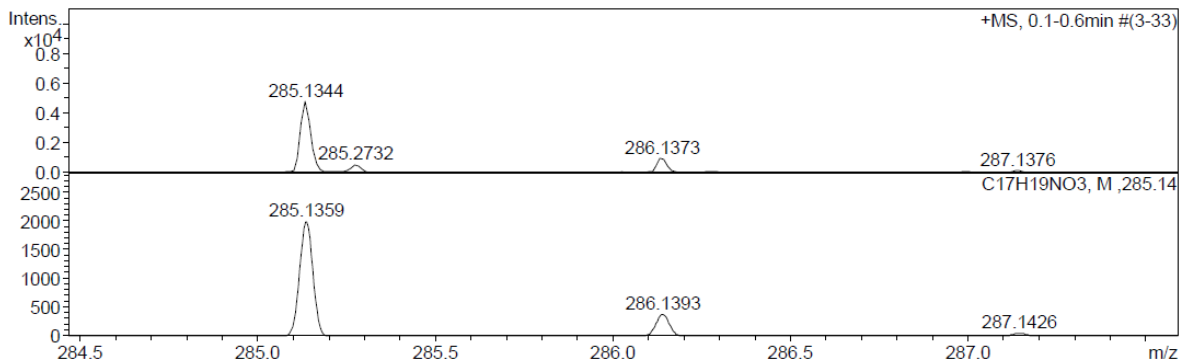

# Display Report

## Analysis Info

Analysis Name D:\Data\user data\2013\DEC\02 DEC\Dr.S.Kumar-AY-82-I\_1-A,6\_01\_1619.d Acquisition Date 12/2/2013 12:56:06 PM  
Method HRLCMS-6 FEB.m Operator Amit  
Sample Name Dr.S.Kumar-AY-82-I Instrument micrOTOF-Q II 10330  
Comment

## Acquisition Parameter

|             |          |                       |           |                  |           |
|-------------|----------|-----------------------|-----------|------------------|-----------|
| Source Type | ESI      | Ion Polarity          | Negative  | Set Nebulizer    | 1.2 Bar   |
| Focus       | Active   | Set Capillary         | 2500 V    | Set Dry Heater   | 200 °C    |
| Scan Begin  | 50 m/z   | Set End Plate Offset  | -500 V    | Set Dry Gas      | 7.0 l/min |
| Scan End    | 3000 m/z | Set Collision Cell RF | 130.0 Vpp | Set Divert Valve | Waste     |

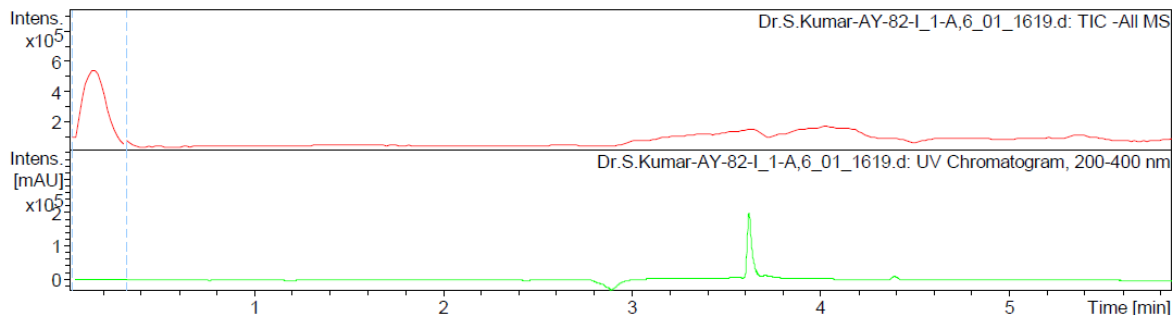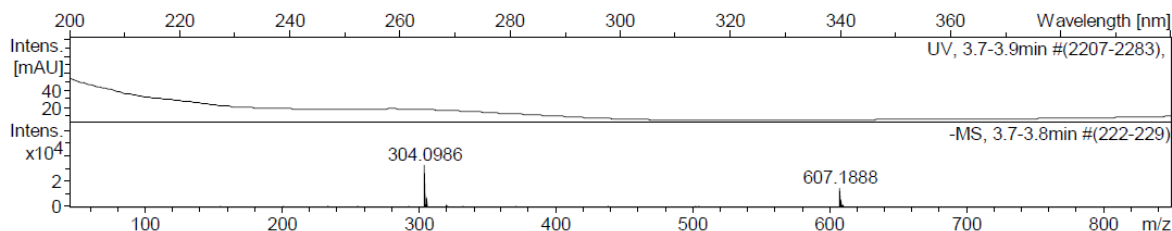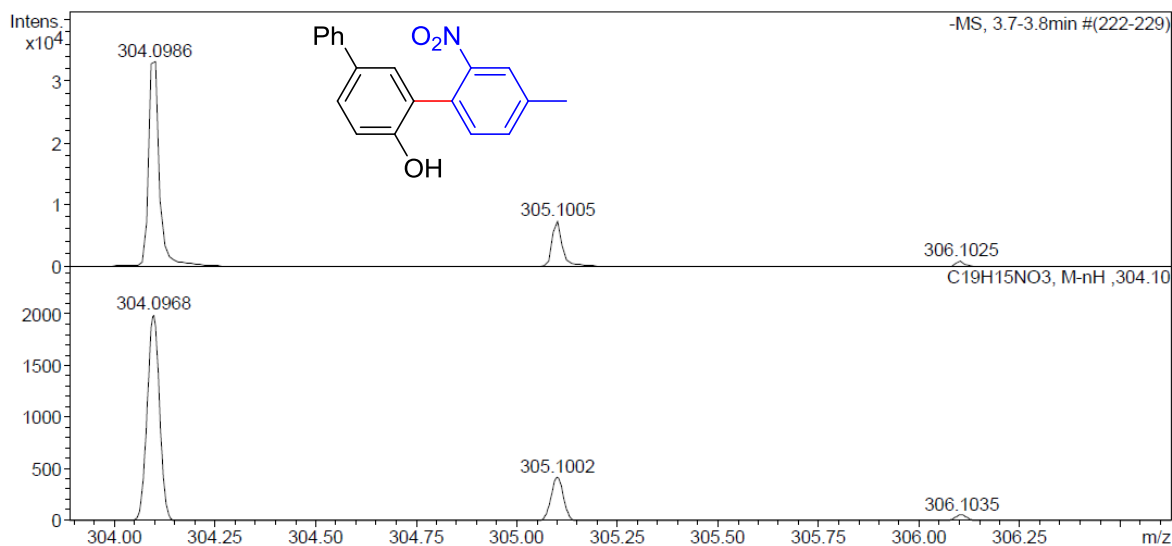

# Display Report

## Analysis Info

Analysis Name D:\Data\user data\2014\JAN\03 jan\Dr.S.Kumar-AY-42-2.d  
Method tune\_low.m  
Sample Name AY-42  
Comment

Acquisition Date 1/3/2014 1:10:23 PM

Operator Amit  
Instrument micrOTOF-Q II 10330

## Acquisition Parameter

|             |            |                       |           |                  |           |
|-------------|------------|-----------------------|-----------|------------------|-----------|
| Source Type | ESI        | Ion Polarity          | Positive  | Set Nebulizer    | 0.4 Bar   |
| Focus       | Not active | Set Capillary         | 4600 V    | Set Dry Heater   | 180 °C    |
| Scan Begin  | 50 m/z     | Set End Plate Offset  | -500 V    | Set Dry Gas      | 4.0 l/min |
| Scan End    | 3000 m/z   | Set Collision Cell RF | 130.0 Vpp | Set Divert Valve | Waste     |

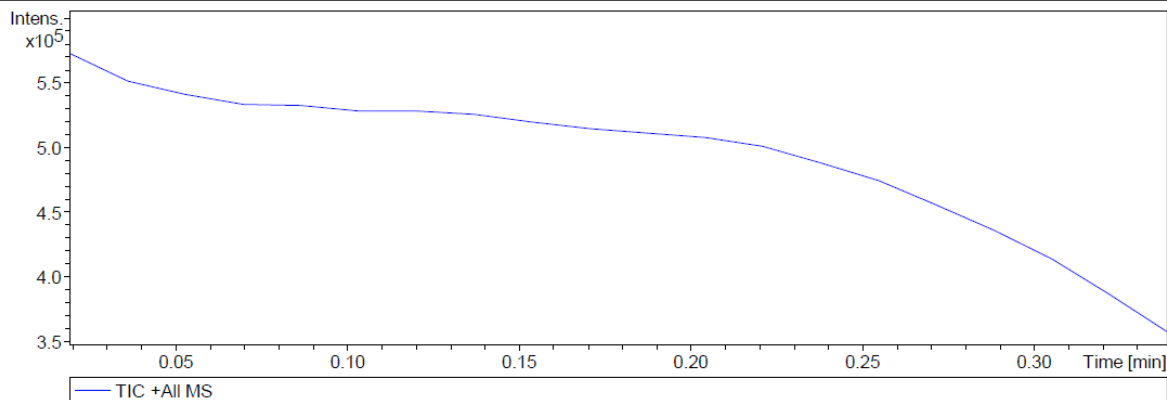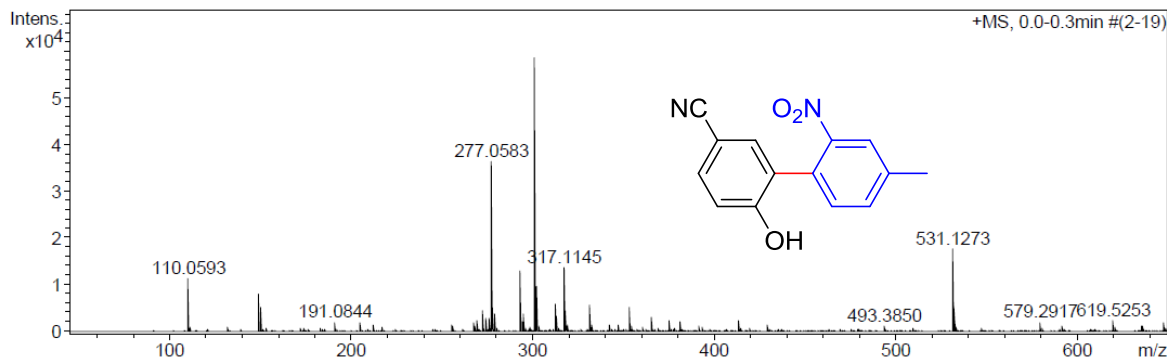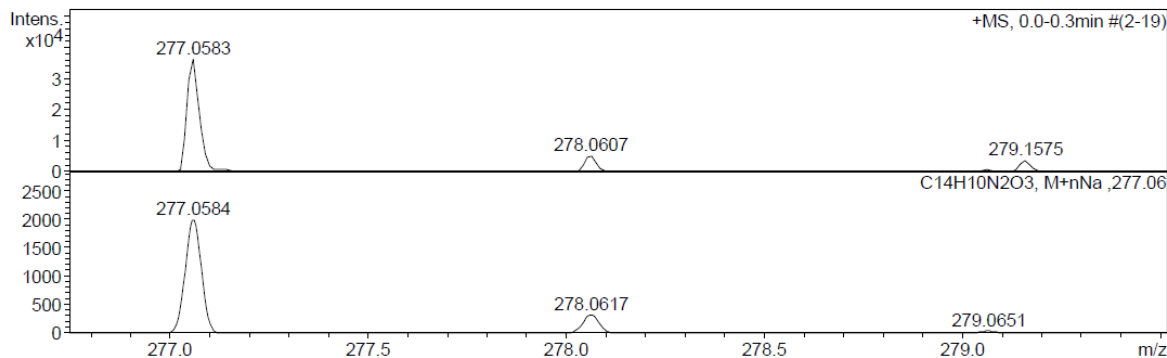

# Display Report

## Analysis Info

Analysis Name D:\Data\user data\2013\NOV\29 nov\Dr.S.Kumar-AY-80-II\_1-A,5\_01\_1601.d  
Method HRLCMS-6 FEB.m  
Sample Name Dr.S.Kumar-AY-80-II  
Comment

Acquisition Date 11/29/2013 12:54:47 PM

Operator Amit  
Instrument micrOTOF-Q II 10330

## Acquisition Parameter

|             |          |                       |           |                  |           |
|-------------|----------|-----------------------|-----------|------------------|-----------|
| Source Type | ESI      | Ion Polarity          | Negative  | Set Nebulizer    | 1.2 Bar   |
| Focus       | Active   | Set Capillary         | 2500 V    | Set Dry Heater   | 200 °C    |
| Scan Begin  | 50 m/z   | Set End Plate Offset  | -500 V    | Set Dry Gas      | 7.0 l/min |
| Scan End    | 3000 m/z | Set Collision Cell RF | 130.0 Vpp | Set Divert Valve | Waste     |

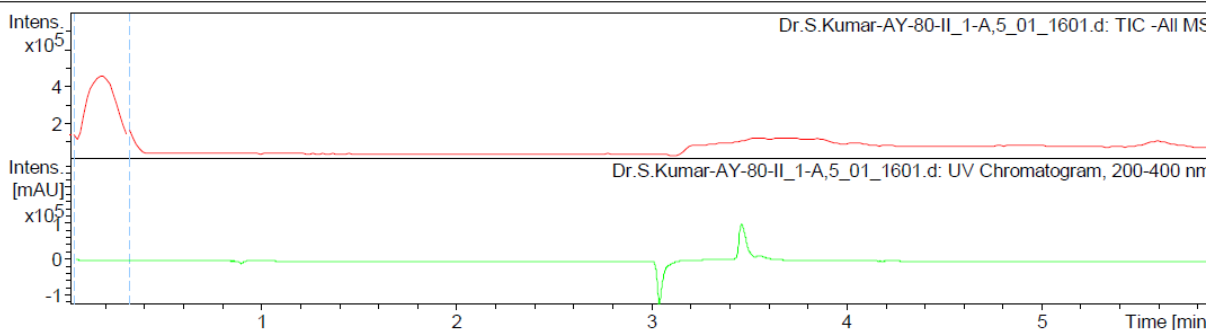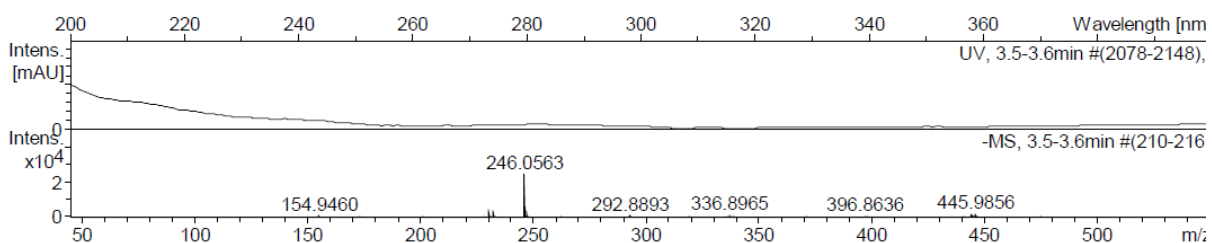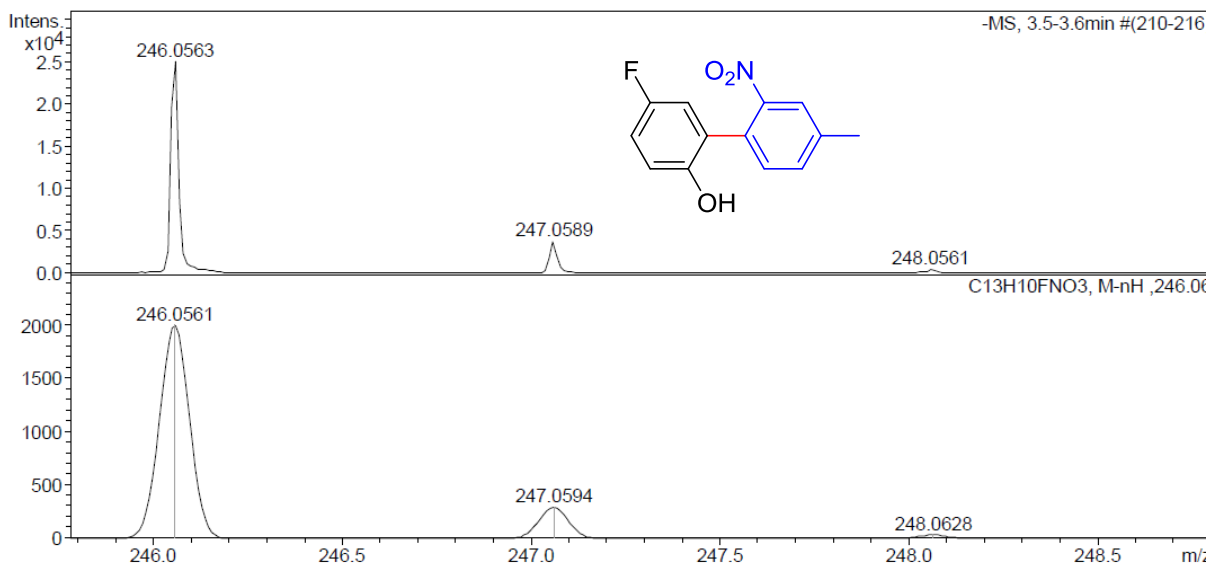

# Display Report

## Analysis Info

Analysis Name D:\Data\user data\2013\NOV\29 nov\Dr.S.Kumar-AY-81\_1-A,6\_01\_1602.d  
Method HRLCMS-6 FEB.m  
Sample Name Dr.S.Kumar-AY-81  
Comment

Acquisition Date 11/29/2013 1:01:57 PM  
Operator Amit  
Instrument micrOTOF-Q II 10330

## Acquisition Parameter

|             |          |                       |           |                  |           |
|-------------|----------|-----------------------|-----------|------------------|-----------|
| Source Type | ESI      | Ion Polarity          | Negative  | Set Nebulizer    | 1.2 Bar   |
| Focus       | Active   | Set Capillary         | 2500 V    | Set Dry Heater   | 200 °C    |
| Scan Begin  | 50 m/z   | Set End Plate Offset  | -500 V    | Set Dry Gas      | 7.0 l/min |
| Scan End    | 3000 m/z | Set Collision Cell RF | 130.0 Vpp | Set Divert Valve | Waste     |

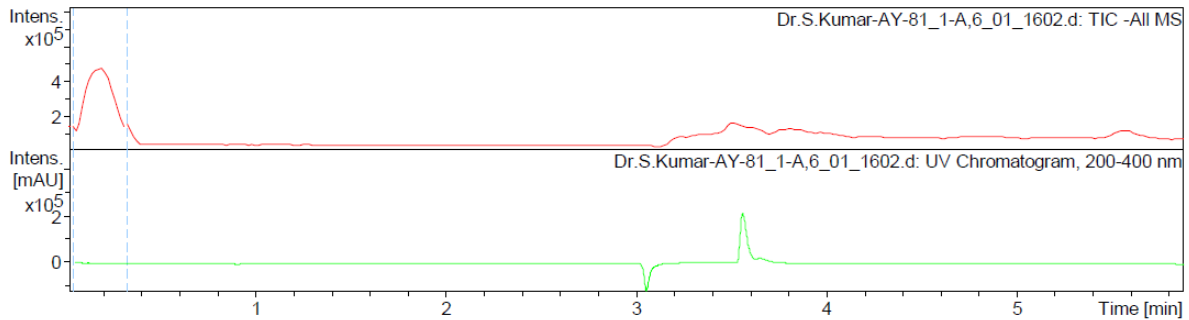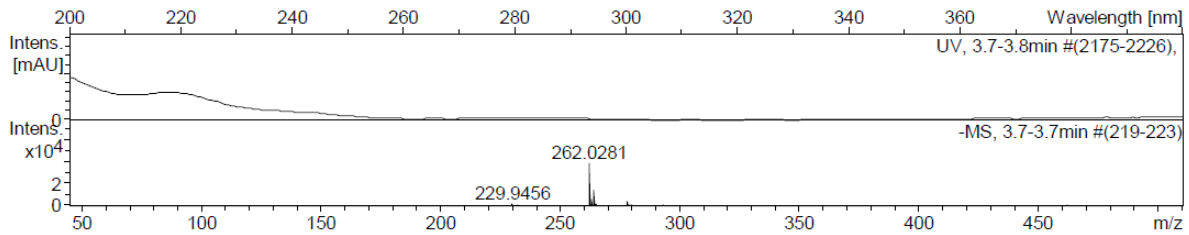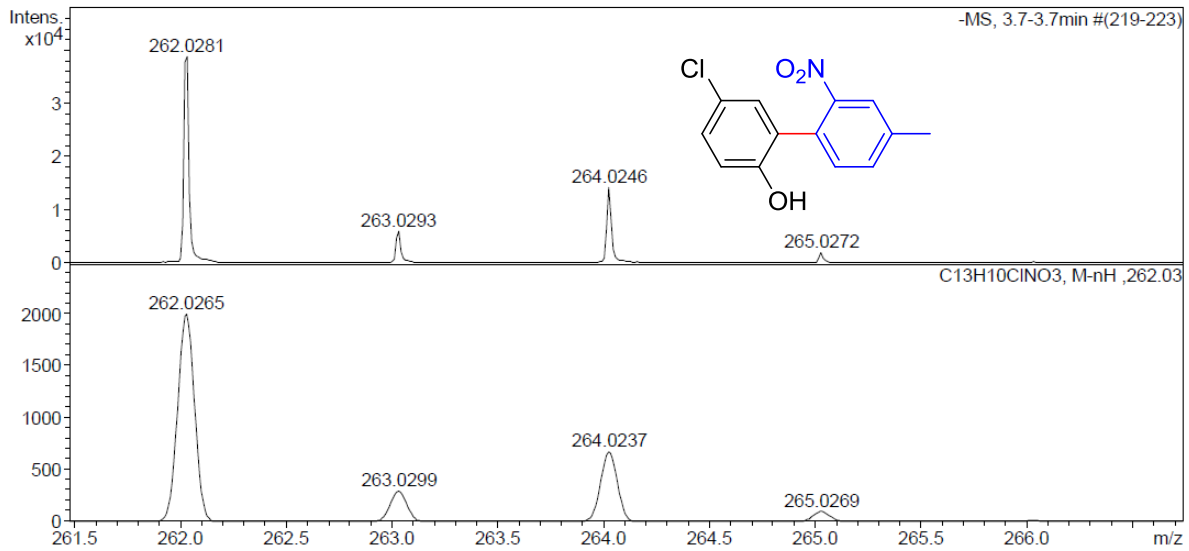



# Display Report

## Analysis Info

Analysis Name D:\Data\user data\2014\JAN\03 jan\Dr.S.Kumar-AY-52-1.d  
Method tune\_low.m  
Sample Name AY-52  
Comment

Acquisition Date 1/3/2014 1:14:46 PM  
Operator Amit  
Instrument micrOTOF-Q II 10330

## Acquisition Parameter

|             |            |                       |           |                  |           |
|-------------|------------|-----------------------|-----------|------------------|-----------|
| Source Type | ESI        | Ion Polarity          | Positive  | Set Nebulizer    | 0.4 Bar   |
| Focus       | Not active | Set Capillary         | 4600 V    | Set Dry Heater   | 180 °C    |
| Scan Begin  | 50 m/z     | Set End Plate Offset  | -500 V    | Set Dry Gas      | 4.0 l/min |
| Scan End    | 3000 m/z   | Set Collision Cell RF | 130.0 Vpp | Set Divert Valve | Waste     |

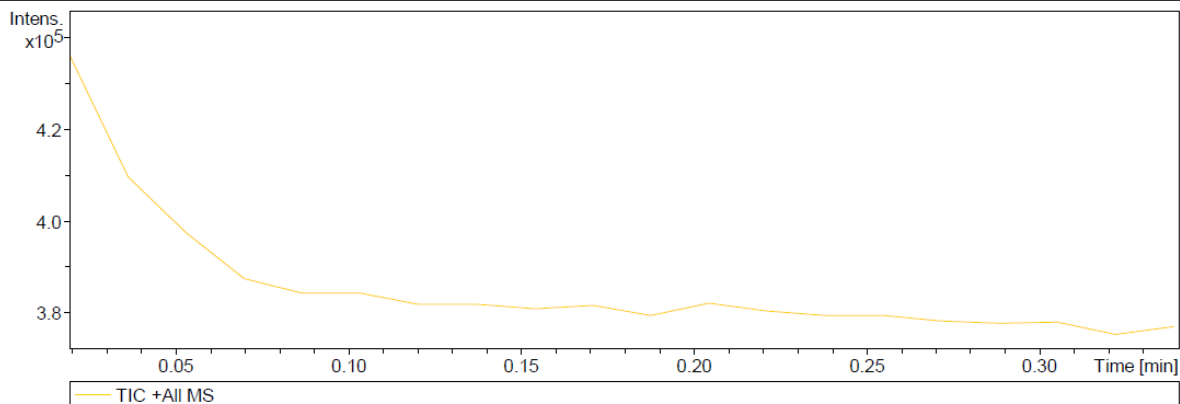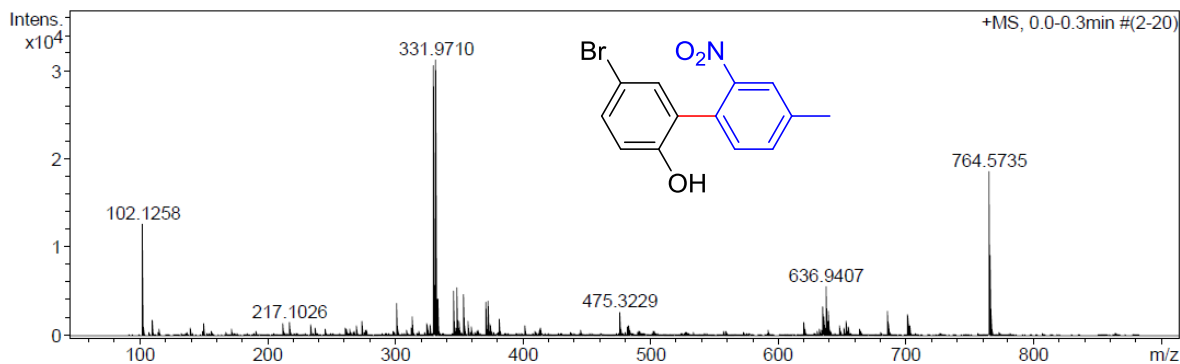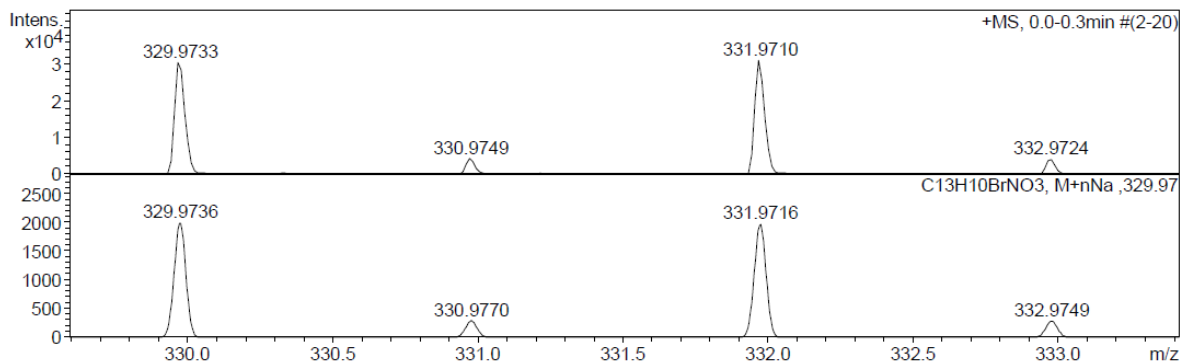

# Display Report

## Analysis Info

Analysis Name D:\Data\user data\2014\JAN\01jan\Dr.S.kumar-AY-91.d  
Method tune\_low.m  
Sample Name AY-91  
Comment

Acquisition Date 1/1/2014 2:59:21 PM  
Operator Amit  
Instrument micrOTOF-Q II 10330

## Acquisition Parameter

|             |            |                       |           |                  |           |
|-------------|------------|-----------------------|-----------|------------------|-----------|
| Source Type | ESI        | Ion Polarity          | Positive  | Set Nebulizer    | 0.4 Bar   |
| Focus       | Not active | Set Capillary         | 4600 V    | Set Dry Heater   | 180 °C    |
| Scan Begin  | 50 m/z     | Set End Plate Offset  | -500 V    | Set Dry Gas      | 4.0 l/min |
| Scan End    | 3000 m/z   | Set Collision Cell RF | 100.0 Vpp | Set Divert Valve | Waste     |

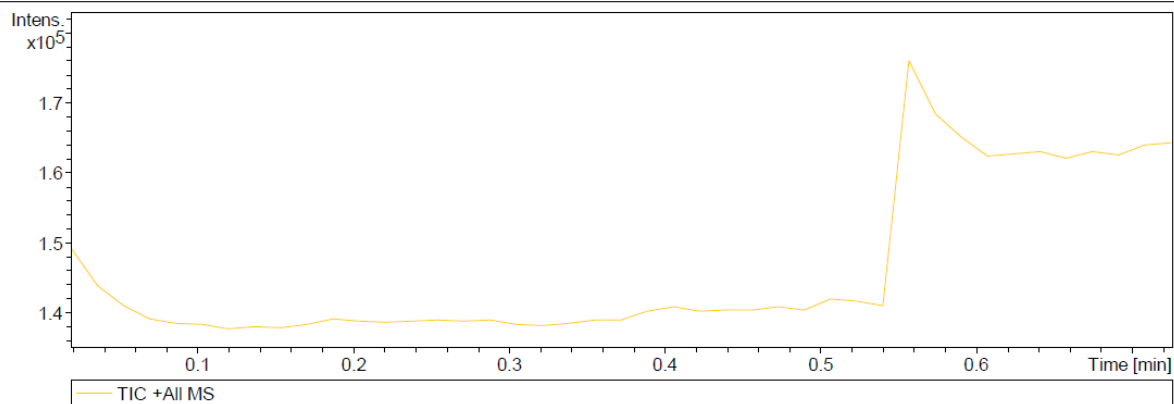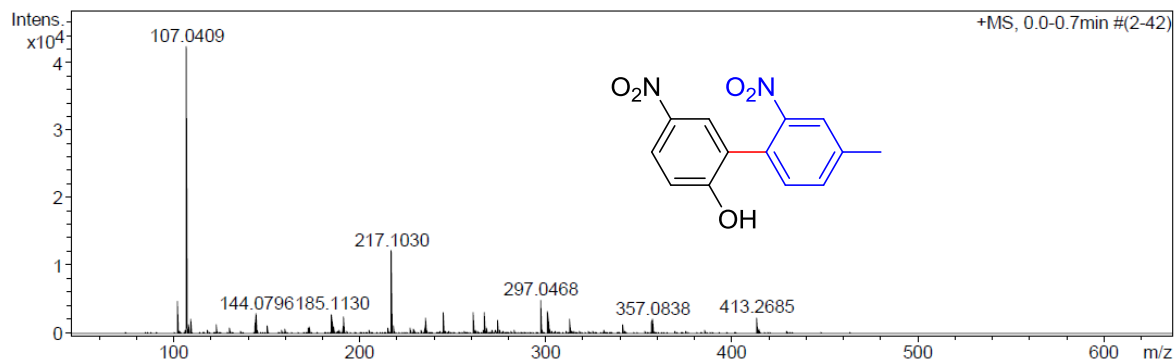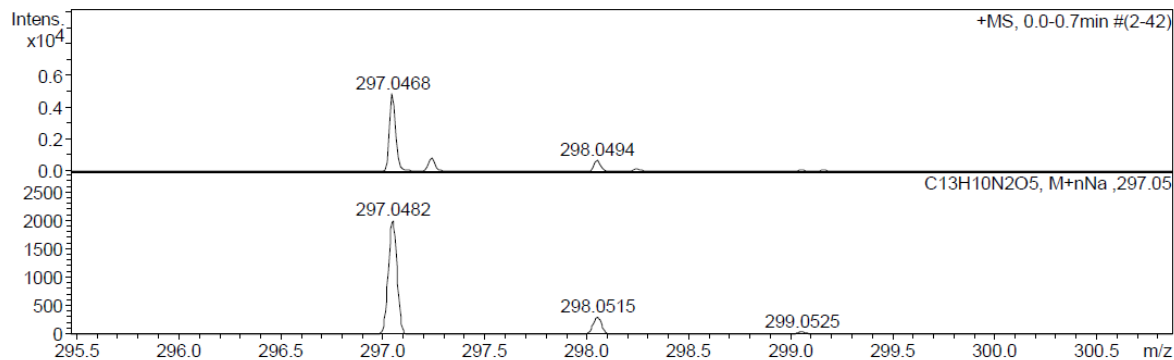

# Display Report

## Analysis Info

Analysis Name D:\Data\user data\2013\NOV\29 nov\Dr.S.Kumar-AY-64III\_1-A,3\_01\_1599.d  
Method HRLCMS-6 FEB.m  
Sample Name Dr.S.Kumar-AY-64III  
Comment  
Acquisition Date 11/29/2013 12:40:31 PM  
Operator Amit  
Instrument micrOTOF-Q II 10330

## Acquisition Parameter

|             |          |                       |           |                  |           |
|-------------|----------|-----------------------|-----------|------------------|-----------|
| Source Type | ESI      | Ion Polarity          | Negative  | Set Nebulizer    | 1.2 Bar   |
| Focus       | Active   | Set Capillary         | 2500 V    | Set Dry Heater   | 200 °C    |
| Scan Begin  | 50 m/z   | Set End Plate Offset  | -500 V    | Set Dry Gas      | 7.0 l/min |
| Scan End    | 3000 m/z | Set Collision Cell RF | 130.0 Vpp | Set Divert Valve | Waste     |

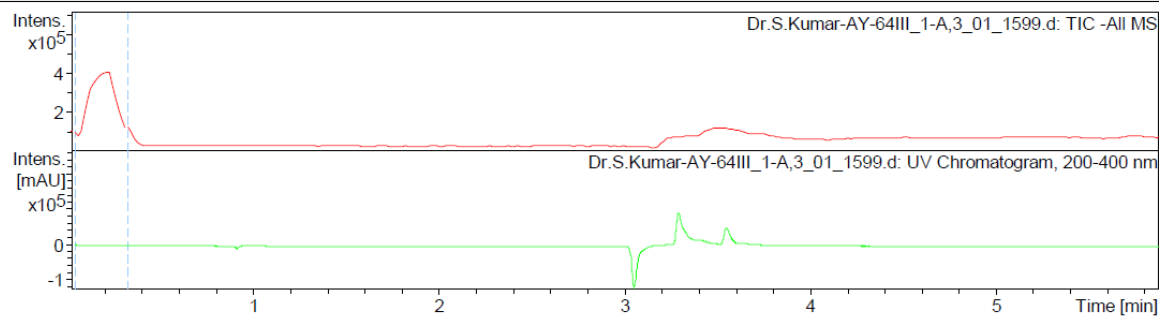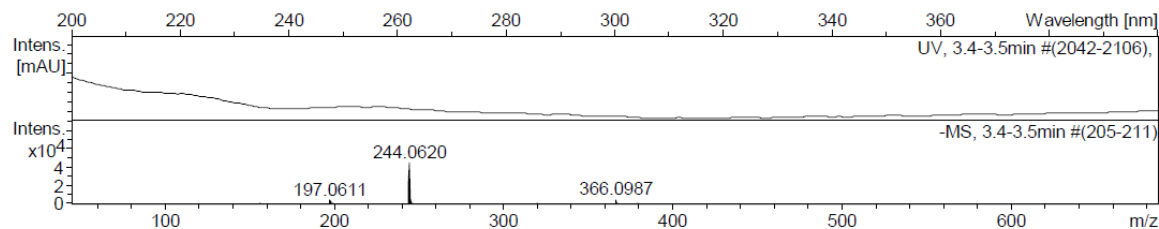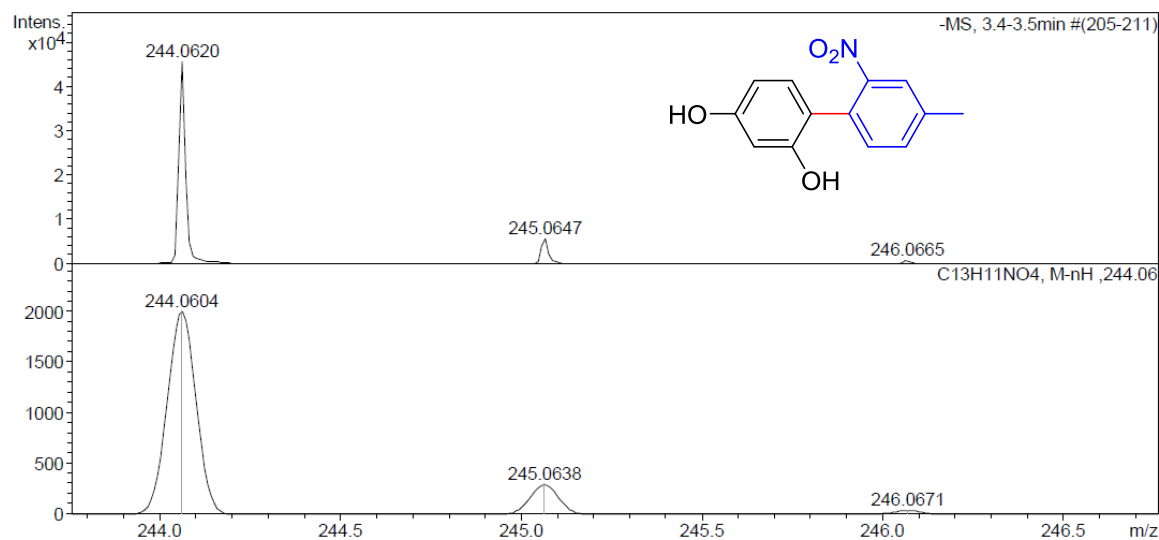

# Display Report

**Analysis Info**

|               |                                                                        |                  |                       |
|---------------|------------------------------------------------------------------------|------------------|-----------------------|
| Analysis Name | D:\Data\user data\2014\MARCH\18 MAR\Dr.Sangit-AK-5-108_1-A,3_01_2110.d | Acquisition Date | 3/18/2014 12:14:45 PM |
| Method        | HRLCMS-20 Sept.m                                                       | Operator         | Amit                  |
| Sample Name   | Dr.Sangit-AK-5-108                                                     | Instrument       | micrOTOF-Q II 10330   |
| Comment       |                                                                        |                  |                       |

**Acquisition Parameter**

|             |          |                       |           |                  |           |
|-------------|----------|-----------------------|-----------|------------------|-----------|
| Source Type | ESI      | Ion Polarity          | Positive  | Set Nebulizer    | 1.2 Bar   |
| Focus       | Active   | Set Capillary         | 4500 V    | Set Dry Heater   | 200 °C    |
| Scan Begin  | 50 m/z   | Set End Plate Offset  | -500 V    | Set Dry Gas      | 7.0 l/min |
| Scan End    | 3000 m/z | Set Collision Cell RF | 130.0 Vpp | Set Divert Valve | Waste     |

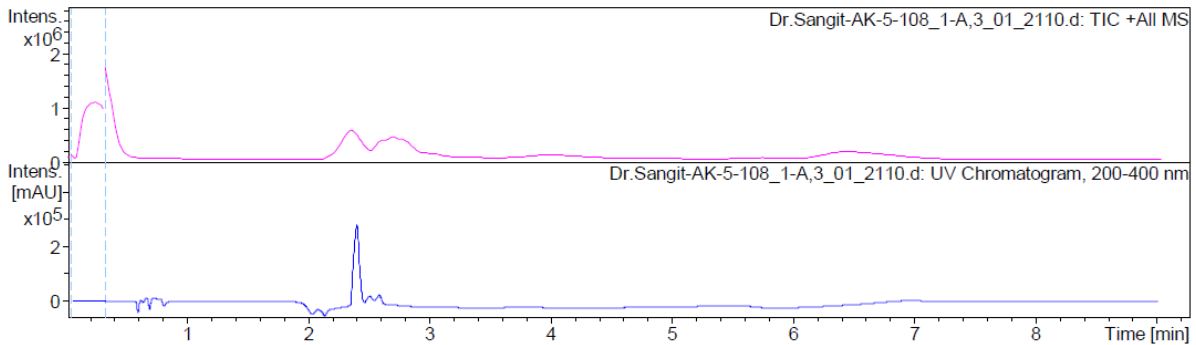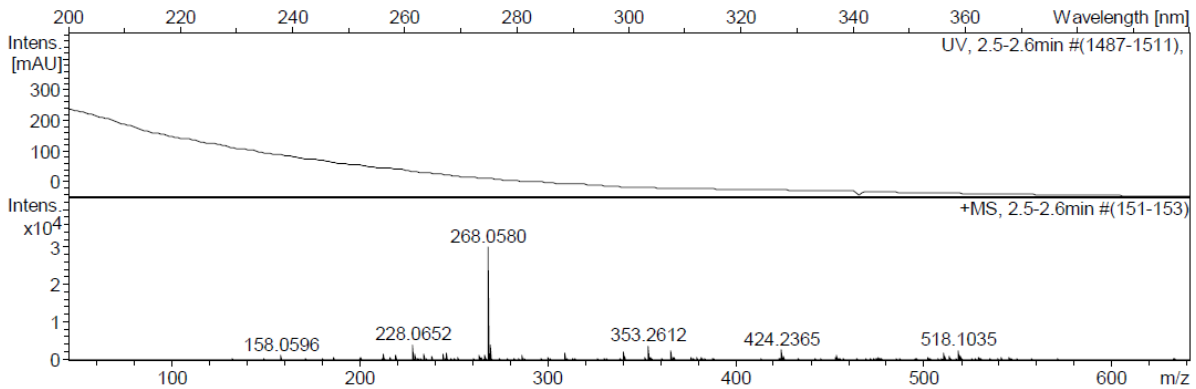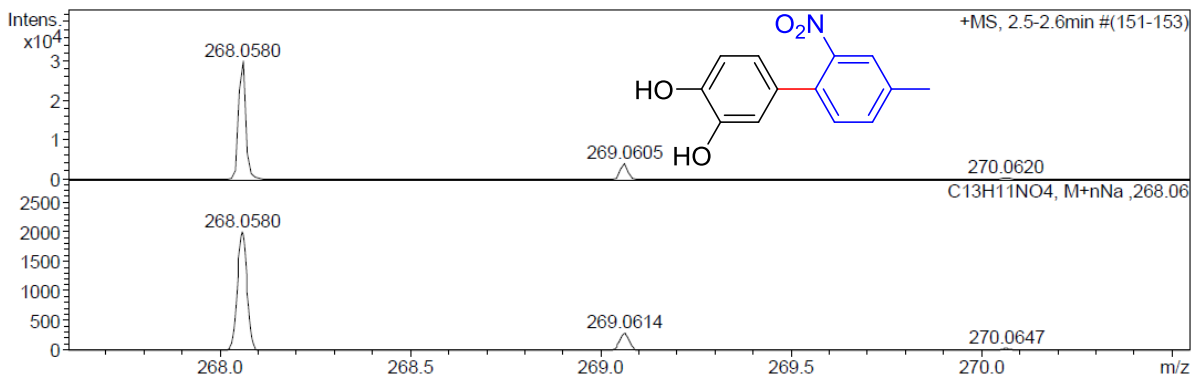

# Display Report

## Analysis Info

Analysis Name D:\Data\user data\2013\DEC\27 dec\Dr. S.Kumar-AK-4-40(II).d  
Method tune\_low.m  
Sample Name AK-4-40(II)  
Comment

Acquisition Date 12/30/2013 12:01:20 PM

Operator Amit  
Instrument micrOTOF-Q II 10330

## Acquisition Parameter

|             |            |                       |           |                  |           |
|-------------|------------|-----------------------|-----------|------------------|-----------|
| Source Type | ESI        | Ion Polarity          | Positive  | Set Nebulizer    | 0.4 Bar   |
| Focus       | Not active | Set Capillary         | 4600 V    | Set Dry Heater   | 180 °C    |
| Scan Begin  | 50 m/z     | Set End Plate Offset  | -500 V    | Set Dry Gas      | 4.0 l/min |
| Scan End    | 3000 m/z   | Set Collision Cell RF | 130.0 Vpp | Set Divert Valve | Waste     |

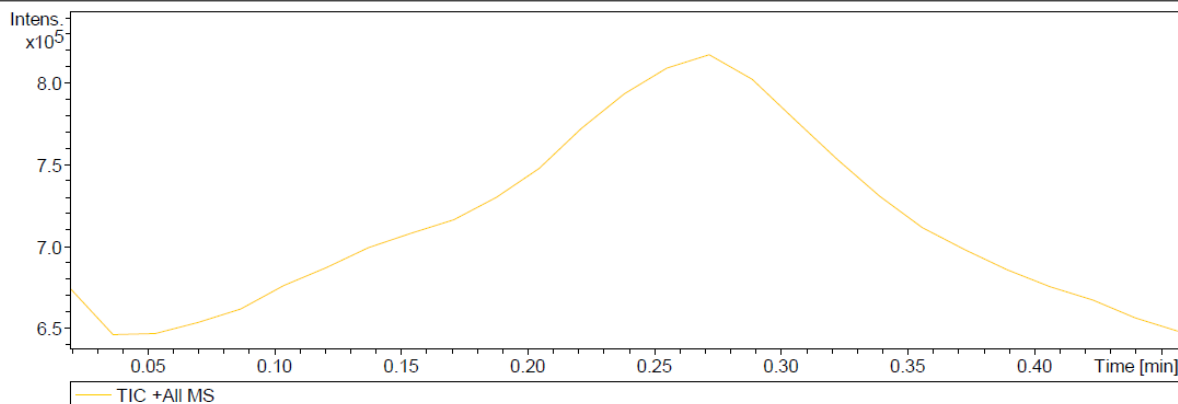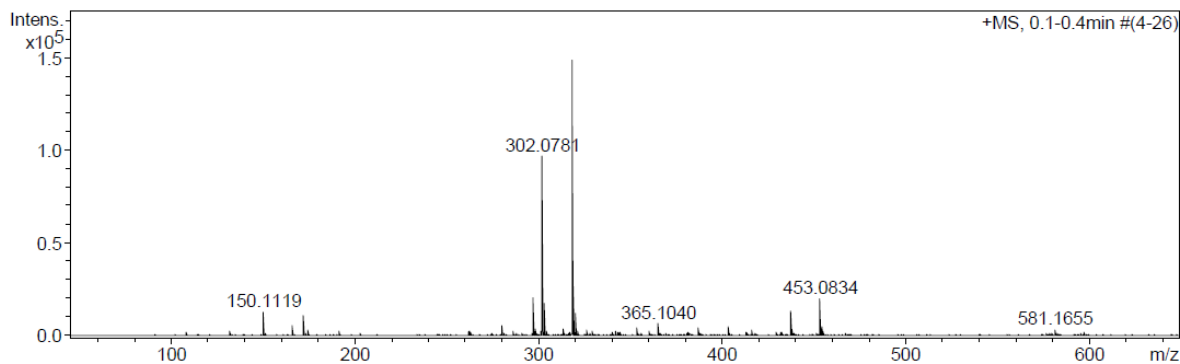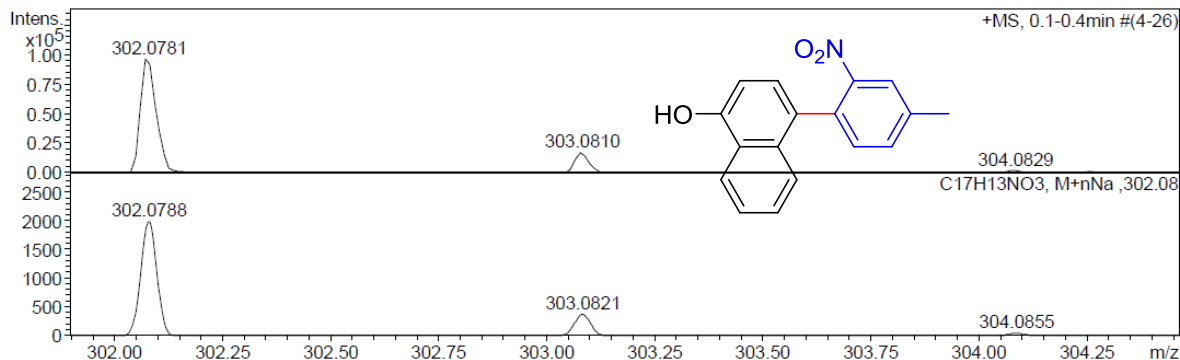

# Display Report

## Analysis Info

Analysis Name D:\Data\user data\2013\DEC\02 DEC\Dr.S.Kumar-AY-87\_1-A,7\_01\_1620.d Acquisition Date 12/2/2013 1:03:17 PM  
Method HRLCMS-6 FEB.m Operator Amit  
Sample Name Dr.S.Kumar-AY-87 Instrument micrOTOF-Q II 10330  
Comment

## Acquisition Parameter

|             |          |                       |           |                  |           |
|-------------|----------|-----------------------|-----------|------------------|-----------|
| Source Type | ESI      | Ion Polarity          | Negative  | Set Nebulizer    | 1.2 Bar   |
| Focus       | Active   | Set Capillary         | 2500 V    | Set Dry Heater   | 200 °C    |
| Scan Begin  | 50 m/z   | Set End Plate Offset  | -500 V    | Set Dry Gas      | 7.0 l/min |
| Scan End    | 3000 m/z | Set Collision Cell RF | 130.0 Vpp | Set Divert Valve | Waste     |

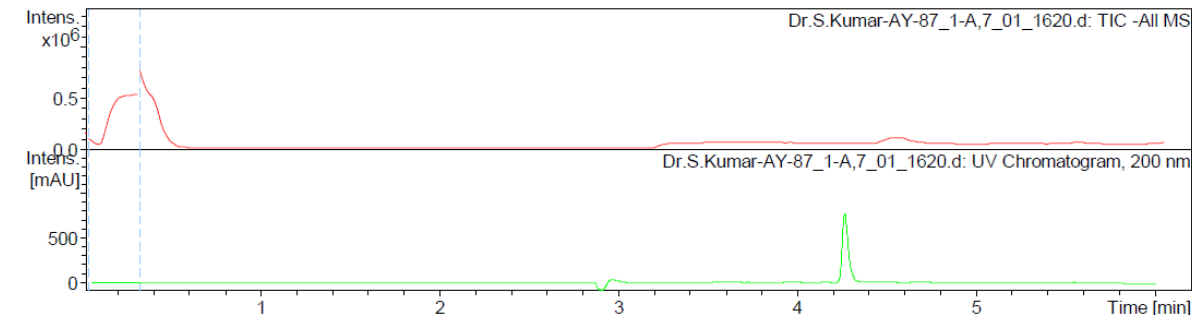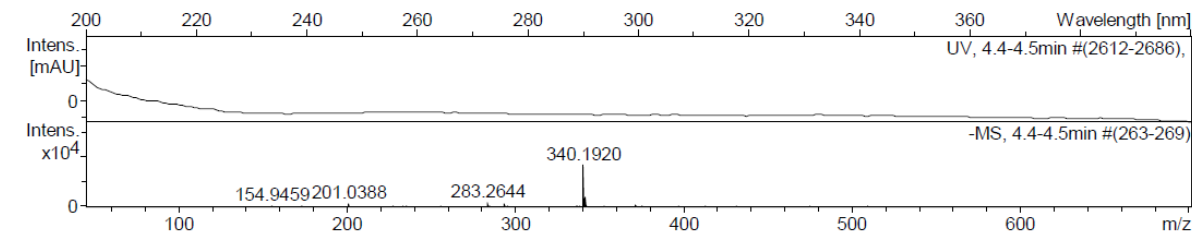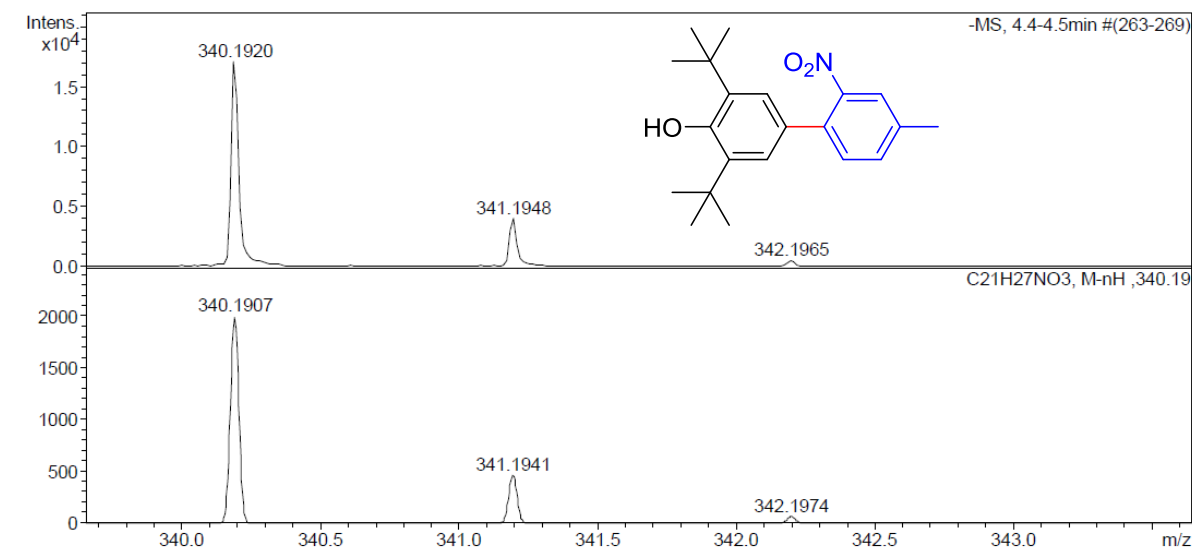

# Display Report

## Analysis Info

Analysis Name D:\Data\user data\2013\DEC\27 dec\Dr.S.Kumar-AK-4-87.d  
Method tune\_low.m  
Sample Name AK-4-87  
Comment

Acquisition Date 12/27/2013 12:37:07 PM

Operator Amit  
Instrument micrOTOF-Q II 10330

## Acquisition Parameter

|             |            |                       |           |                  |           |
|-------------|------------|-----------------------|-----------|------------------|-----------|
| Source Type | APCI       | Ion Polarity          | Positive  | Set Nebulizer    | 1.6 Bar   |
| Focus       | Not active | Set Capillary         | 4500 V    | Set Dry Heater   | 200 °C    |
| Scan Begin  | 50 m/z     | Set End Plate Offset  | -500 V    | Set Dry Gas      | 8.0 l/min |
| Scan End    | 3000 m/z   | Set Collision Cell RF | 130.0 Vpp | Set Divert Valve | Waste     |

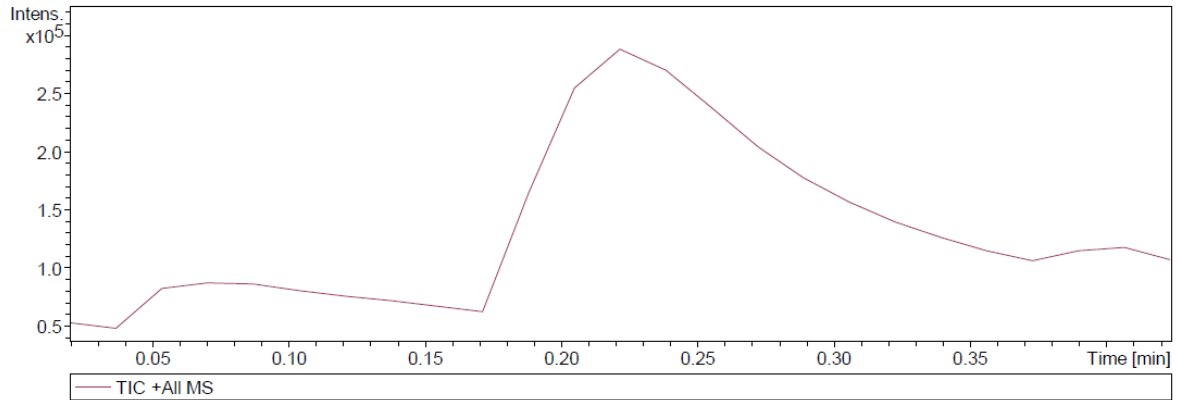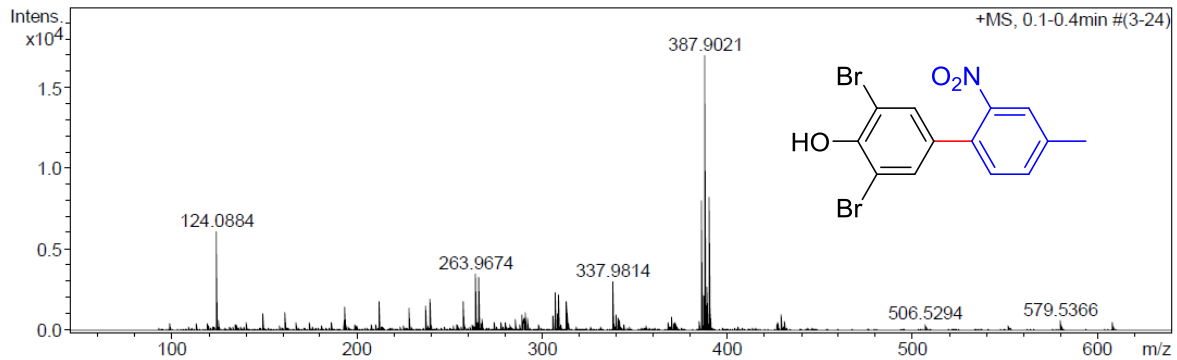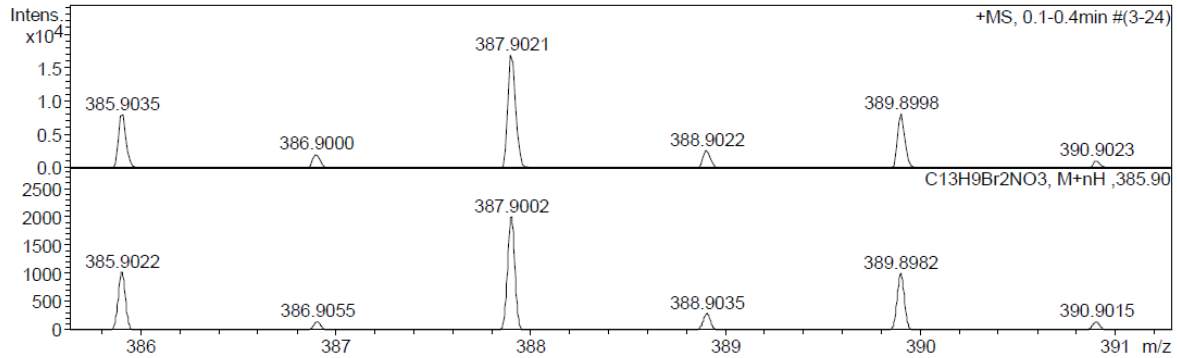

# Display Report

## Analysis Info

Analysis Name D:\Data\user data\2013\DEC\27 dec\Dr.S.Kumar-AK-4-182II.d  
Method tune\_low.m  
Sample Name AK-4-182II  
Comment

Acquisition Date 12/27/2013 12:49:36 PM

Operator Amit  
Instrument micrOTOF-Q II 10330

## Acquisition Parameter

|             |            |                       |           |                  |           |
|-------------|------------|-----------------------|-----------|------------------|-----------|
| Source Type | APCI       | Ion Polarity          | Positive  | Set Nebulizer    | 1.6 Bar   |
| Focus       | Not active | Set Capillary         | 4500 V    | Set Dry Heater   | 200 °C    |
| Scan Begin  | 50 m/z     | Set End Plate Offset  | -500 V    | Set Dry Gas      | 8.0 l/min |
| Scan End    | 3000 m/z   | Set Collision Cell RF | 130.0 Vpp | Set Divert Valve | Waste     |

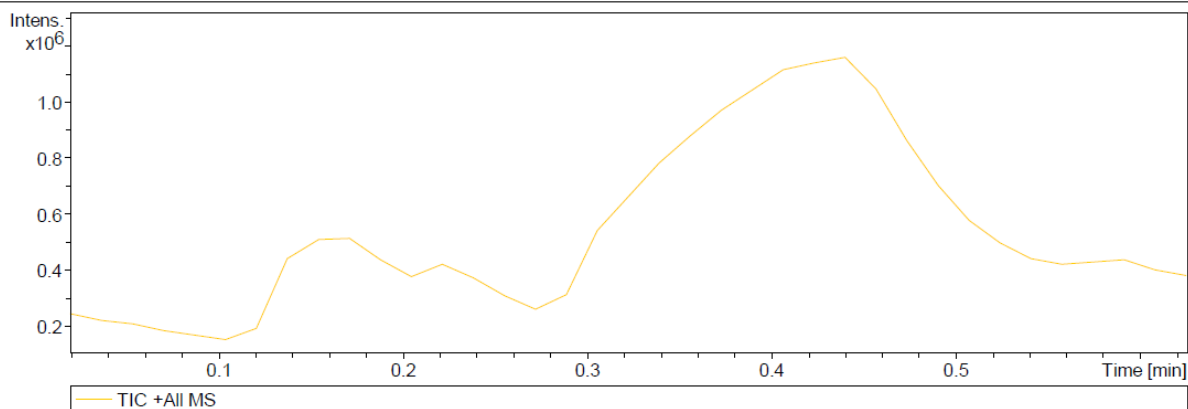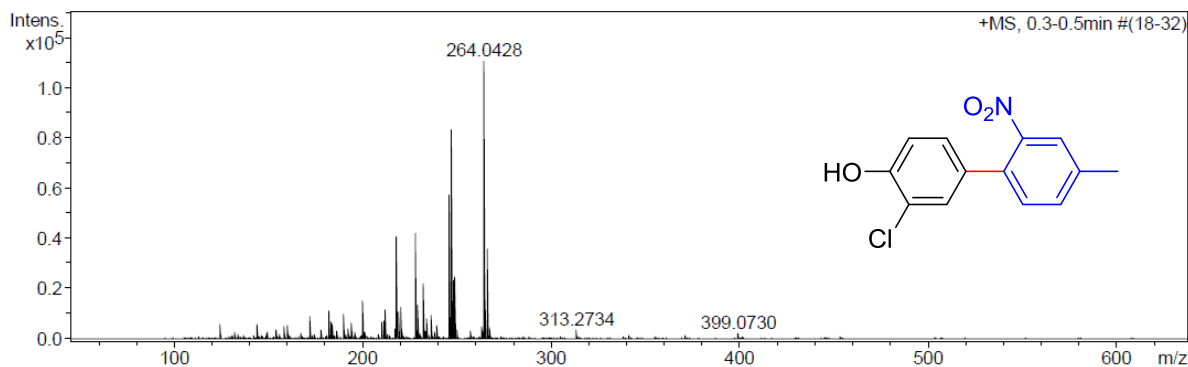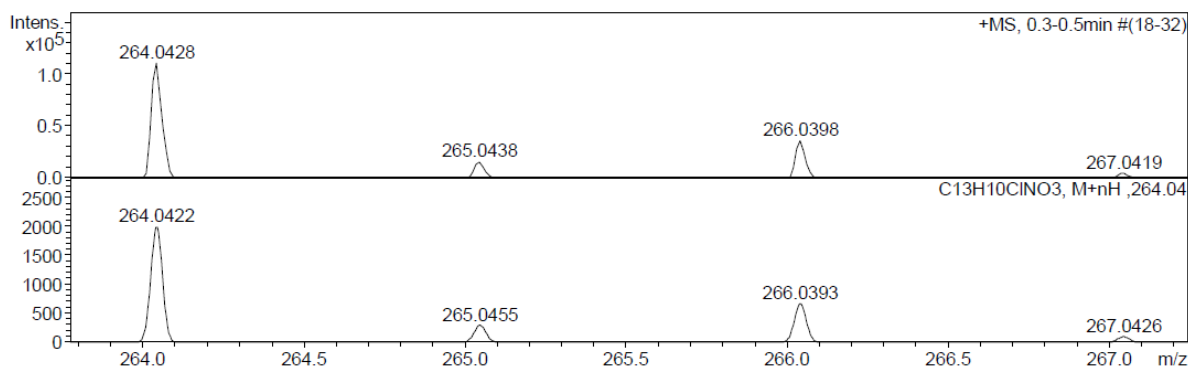



# Display Report

## Analysis Info

Analysis Name D:\Data\user data\2014\JAN\01jan\Dr.S.kumar-AY-58II.d  
Method tune\_low.m  
Sample Name AY-58II  
Comment

Acquisition Date 1/1/2014 2:52:34 PM

Operator Amit  
Instrument micrOTOF-Q II 10330

## Acquisition Parameter

|             |            |                       |           |                  |           |
|-------------|------------|-----------------------|-----------|------------------|-----------|
| Source Type | ESI        | Ion Polarity          | Positive  | Set Nebulizer    | 0.4 Bar   |
| Focus       | Not active | Set Capillary         | 4600 V    | Set Dry Heater   | 180 °C    |
| Scan Begin  | 50 m/z     | Set End Plate Offset  | -500 V    | Set Dry Gas      | 4.0 l/min |
| Scan End    | 3000 m/z   | Set Collision Cell RF | 130.0 Vpp | Set Divert Valve | Waste     |

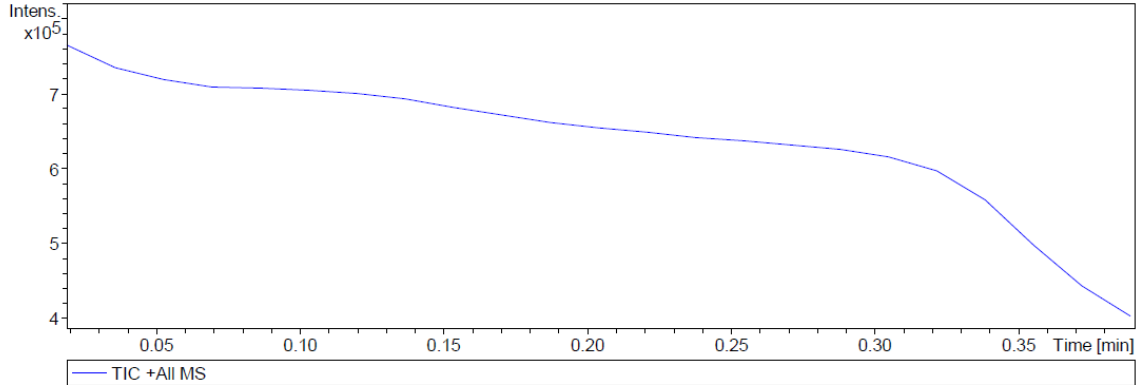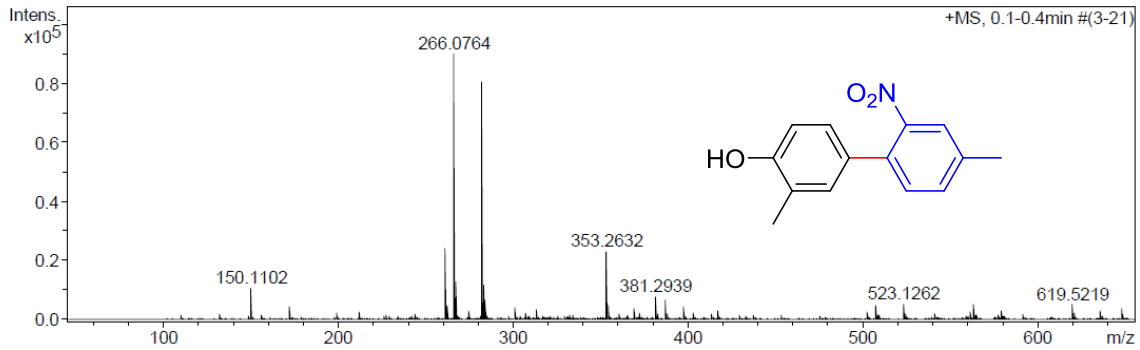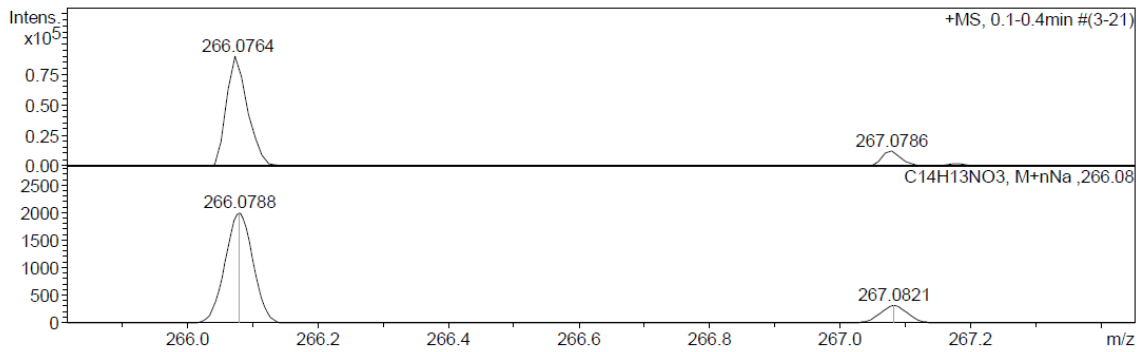

# Display Report

**Analysis Info**  
Analysis Name: D:\Data\user data\2013\NOV\29 nov\Dr.S.Kumar-AY-72\_1-A,2\_01\_1598.d  
Method: HRLCMS-6 FEB.m  
Sample Name: Dr.S.Kumar-AY-72  
Comment:  
Acquisition Date: 11/29/2013 12:33:22 PM  
Operator: Amit  
Instrument: micrOTOF-Q II 10330

## Acquisition Parameter

|             |          |                       |           |                  |           |
|-------------|----------|-----------------------|-----------|------------------|-----------|
| Source Type | ESI      | Ion Polarity          | Negative  | Set Nebulizer    | 1.2 Bar   |
| Focus       | Active   | Set Capillary         | 2500 V    | Set Dry Heater   | 200 °C    |
| Scan Begin  | 50 m/z   | Set End Plate Offset  | -500 V    | Set Dry Gas      | 7.0 l/min |
| Scan End    | 3000 m/z | Set Collision Cell RF | 130.0 Vpp | Set Divert Valve | Waste     |

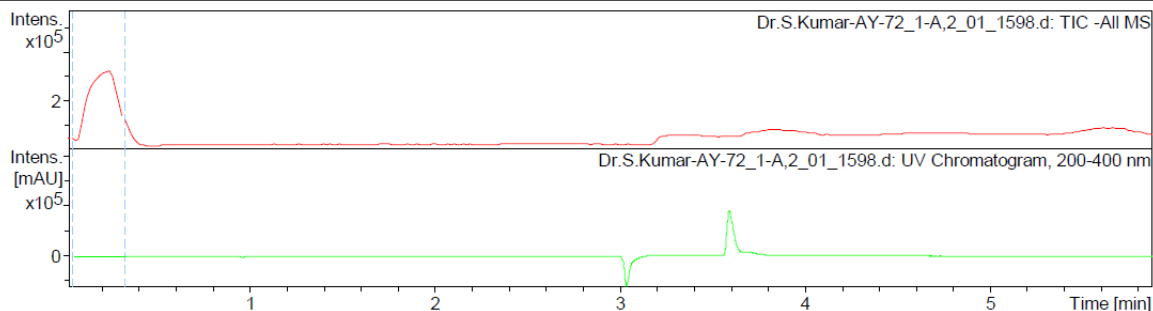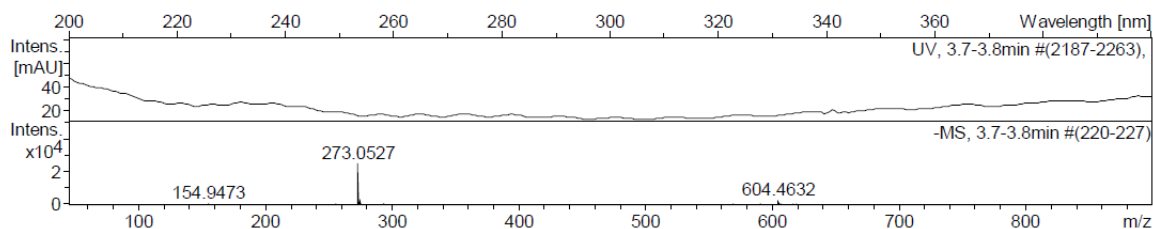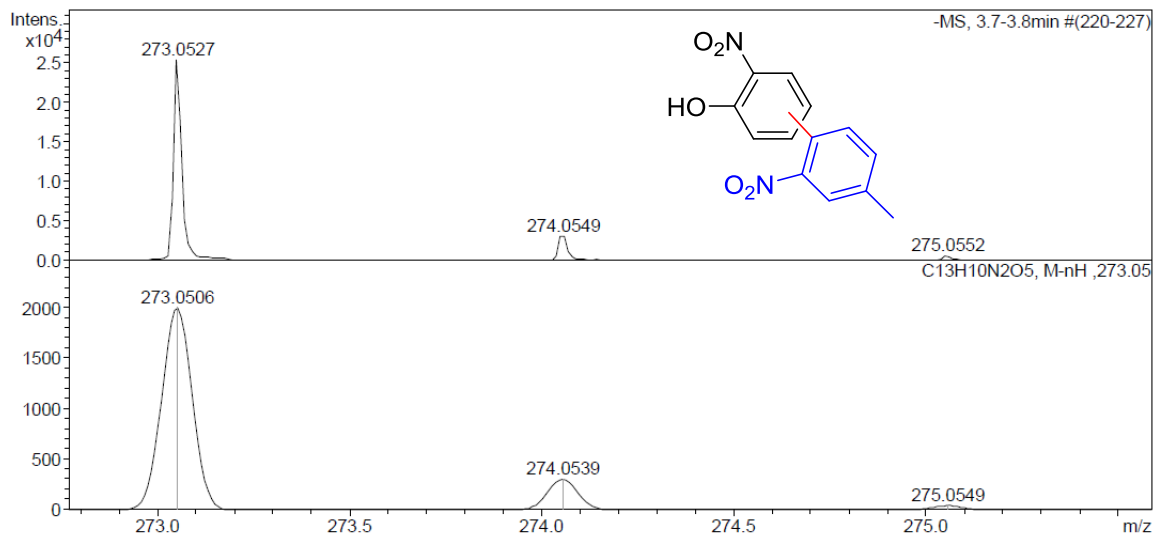

# Display Report

## Analysis Info

Analysis Name D:\Data\user data\2013\NOV\29 nov\Dr.S.Kumar-AY-65III\_1-A,7\_01\_1604.d  
Method HRLCMS-20 Sept.m  
Sample Name Dr.S.Kumar-AY-65III  
Comment

Acquisition Date 11/29/2013 1:16:33 PM  
Operator Amit  
Instrument micrOTOF-Q II 10330

## Acquisition Parameter

|             |          |                       |           |                  |           |
|-------------|----------|-----------------------|-----------|------------------|-----------|
| Source Type | ESI      | Ion Polarity          | Positive  | Set Nebulizer    | 1.2 Bar   |
| Focus       | Active   | Set Capillary         | 4500 V    | Set Dry Heater   | 200 °C    |
| Scan Begin  | 50 m/z   | Set End Plate Offset  | -500 V    | Set Dry Gas      | 7.0 l/min |
| Scan End    | 3000 m/z | Set Collision Cell RF | 130.0 Vpp | Set Divert Valve | Waste     |

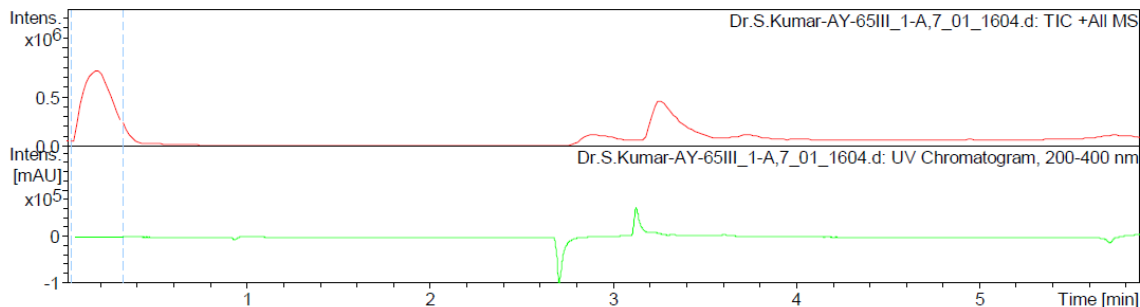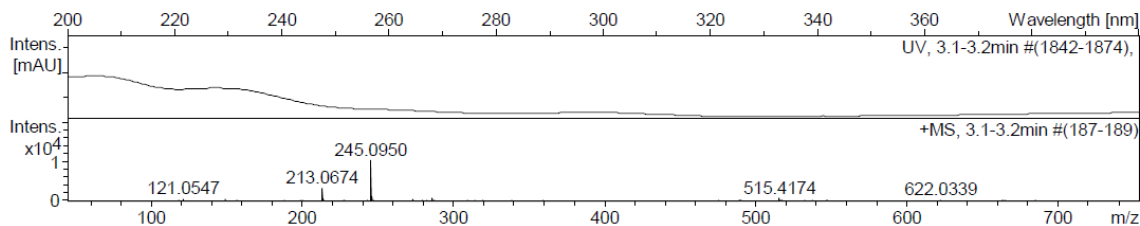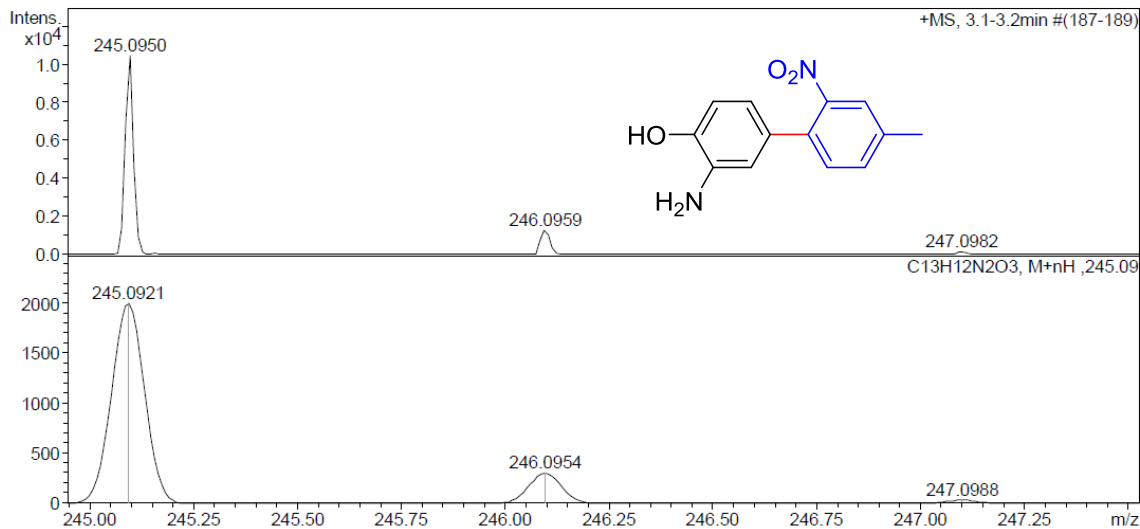

# Display Report

## Analysis Info

Analysis Name D:\Data\user data\2014\JAN\01\jan\Dr.S.kumar-AK-4-183.d  
Method tune\_low.m  
Sample Name AK-4-183  
Comment

Acquisition Date 1/1/2014 3:19:23 PM

Operator Amit  
Instrument micrOTOF-Q II 10330

## Acquisition Parameter

|             |            |                       |           |                  |           |
|-------------|------------|-----------------------|-----------|------------------|-----------|
| Source Type | ESI        | Ion Polarity          | Negative  | Set Nebulizer    | 0.4 Bar   |
| Focus       | Not active | Set Capillary         | 2500 V    | Set Dry Heater   | 180 °C    |
| Scan Begin  | 50 m/z     | Set End Plate Offset  | -500 V    | Set Dry Gas      | 4.0 l/min |
| Scan End    | 3000 m/z   | Set Collision Cell RF | 130.0 Vpp | Set Divert Valve | Waste     |

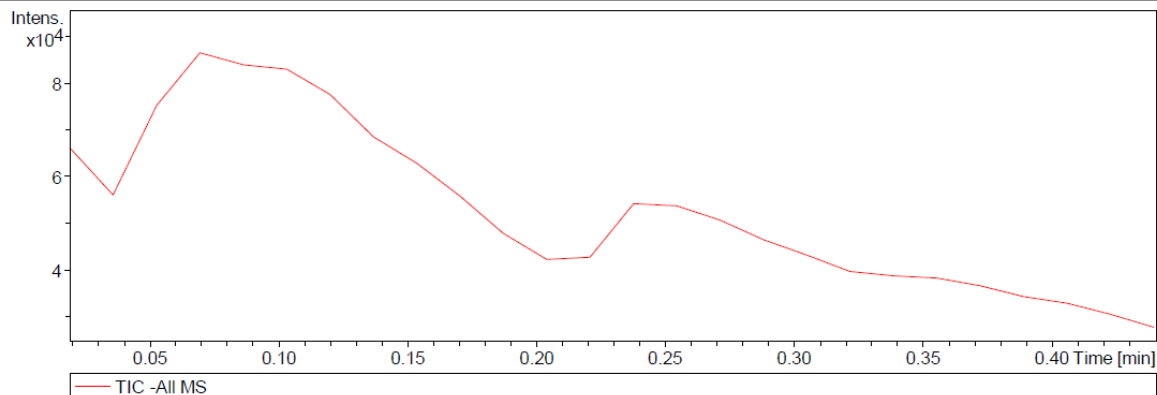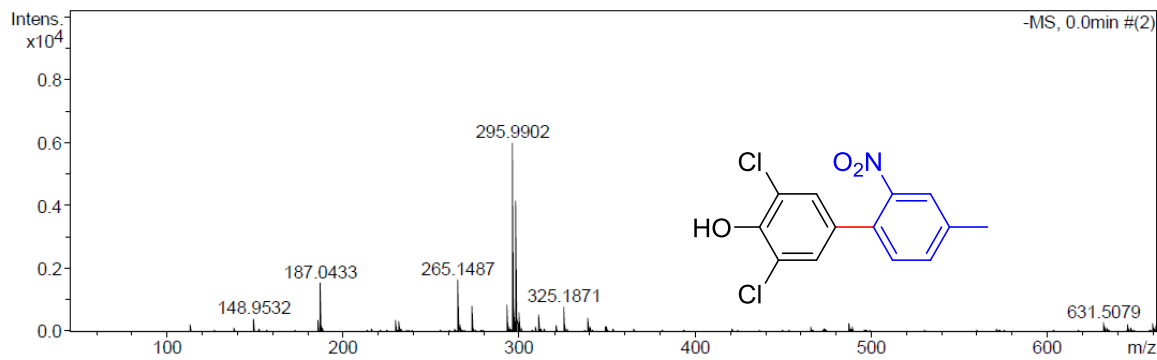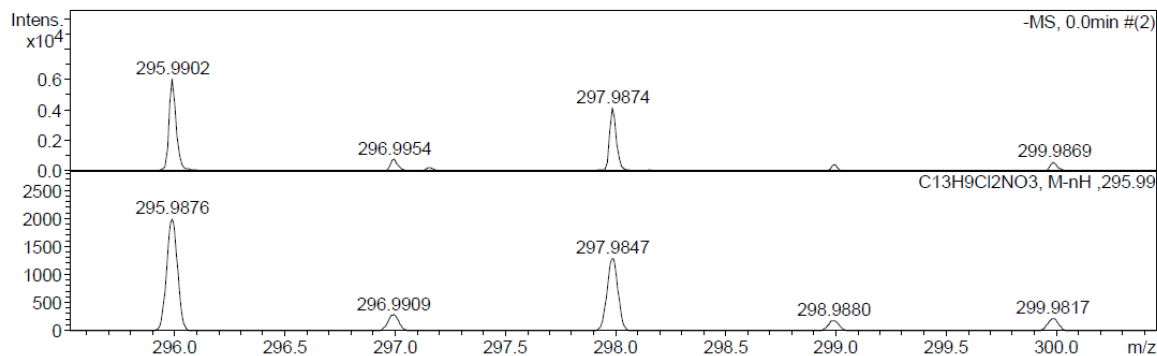

# Display Report

## Analysis Info

Analysis Name D:\Data\user data\2014\FEB\21 FEB\Dr.S.Kumar-AK-5-81\_1-A,4\_01\_1932.d  
Method HRLCMS-20 Sept.m  
Sample Name Dr.S.Kumar-AK-5-81  
Comment

Acquisition Date 2/21/2014 2:08:09 PM  
Operator Amit  
Instrument micrOTOF-Q II 10330

## Acquisition Parameter

|             |          |                       |           |                  |           |
|-------------|----------|-----------------------|-----------|------------------|-----------|
| Source Type | ESI      | Ion Polarity          | Positive  | Set Nebulizer    | 1.2 Bar   |
| Focus       | Active   | Set Capillary         | 4500 V    | Set Dry Heater   | 200 °C    |
| Scan Begin  | 50 m/z   | Set End Plate Offset  | -500 V    | Set Dry Gas      | 7.0 l/min |
| Scan End    | 3000 m/z | Set Collision Cell RF | 130.0 Vpp | Set Divert Valve | Waste     |

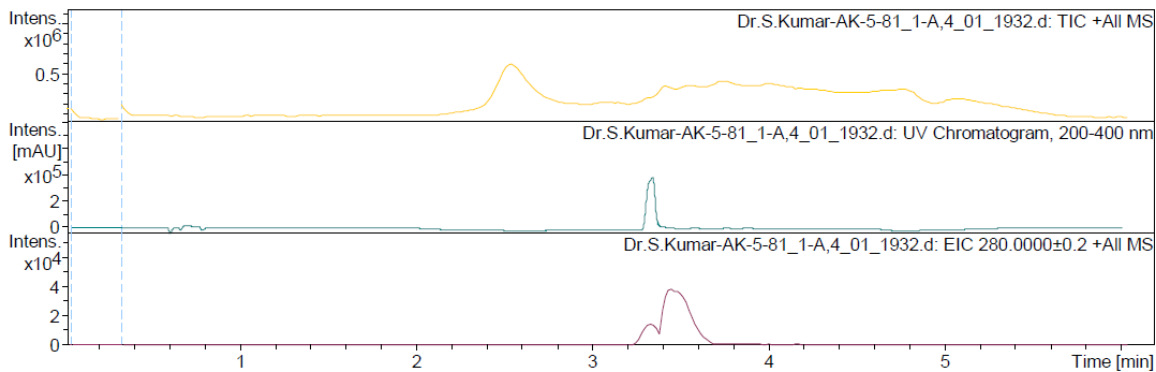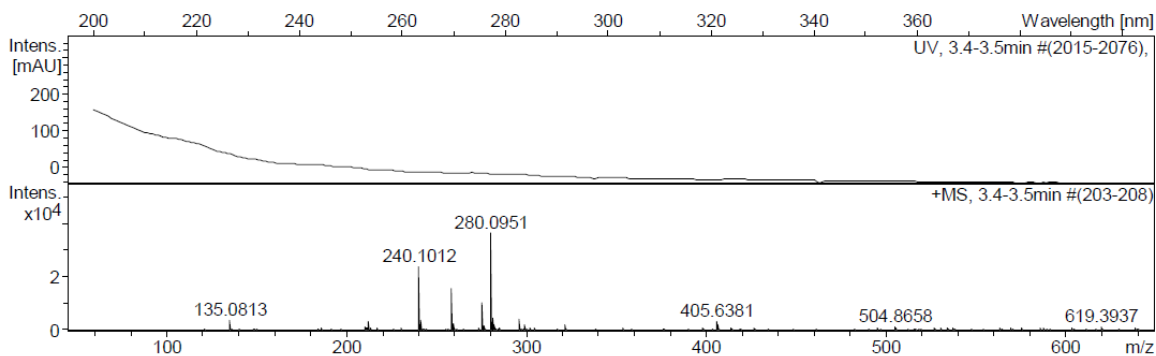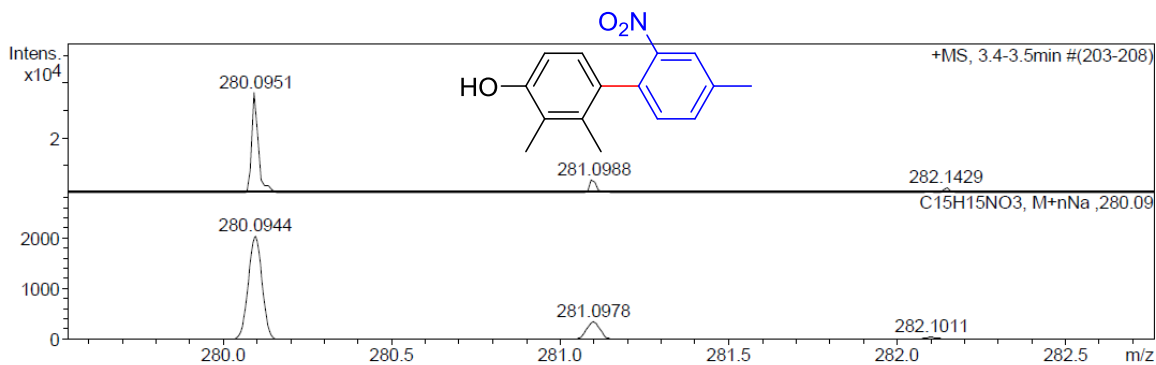

# Display Report

## Analysis Info

Analysis Name D:\Data\user data\2014\JAN\01jan\Dr.S.kumar-AY-129.d  
Method tune\_low.m  
Sample Name AY-129  
Comment

Acquisition Date 1/1/2014 3:02:17 PM  
Operator Amit  
Instrument micrOTOF-Q II 10330

## Acquisition Parameter

|             |            |                       |           |                  |           |
|-------------|------------|-----------------------|-----------|------------------|-----------|
| Source Type | ESI        | Ion Polarity          | Positive  | Set Nebulizer    | 0.4 Bar   |
| Focus       | Not active | Set Capillary         | 4600 V    | Set Dry Heater   | 180 °C    |
| Scan Begin  | 50 m/z     | Set End Plate Offset  | -500 V    | Set Dry Gas      | 4.0 l/min |
| Scan End    | 3000 m/z   | Set Collision Cell RF | 130.0 Vpp | Set Divert Valve | Waste     |

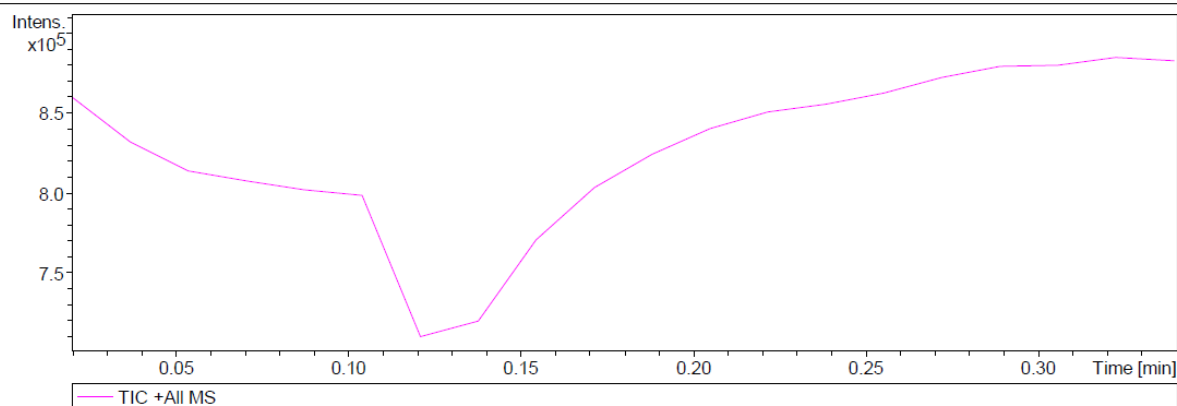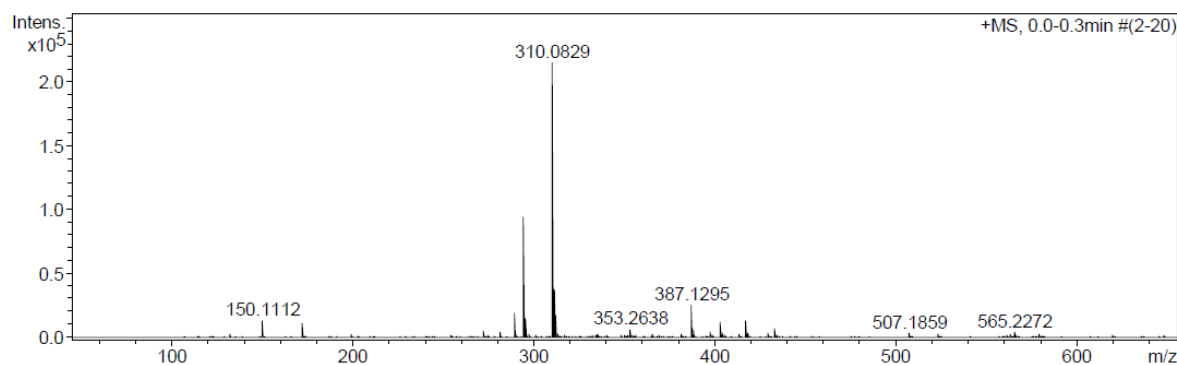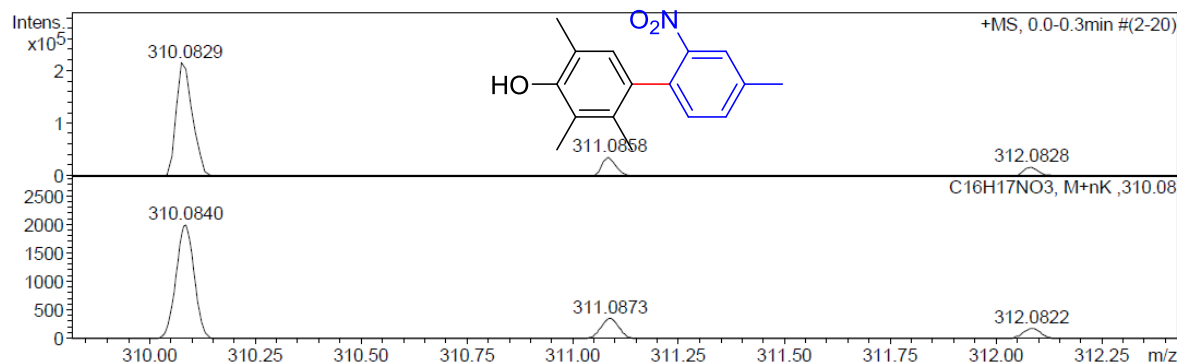

# Display Report

## Analysis Info

Analysis Name D:\Data\user data\2014\JAN\17 jan\Dr.S.Kumar-AK-5-22.d  
Method tune\_low.m  
Sample Name AK-5-22  
Comment

Acquisition Date 1/17/2014 12:31:29 PM

Operator Amit  
Instrument micrOTOF-Q II 10330

## Acquisition Parameter

|             |            |                       |           |                  |           |
|-------------|------------|-----------------------|-----------|------------------|-----------|
| Source Type | ESI        | Ion Polarity          | Positive  | Set Nebulizer    | 0.4 Bar   |
| Focus       | Not active | Set Capillary         | 4600 V    | Set Dry Heater   | 180 °C    |
| Scan Begin  | 50 m/z     | Set End Plate Offset  | -500 V    | Set Dry Gas      | 4.0 l/min |
| Scan End    | 3000 m/z   | Set Collision Cell RF | 130.0 Vpp | Set Divert Valve | Waste     |

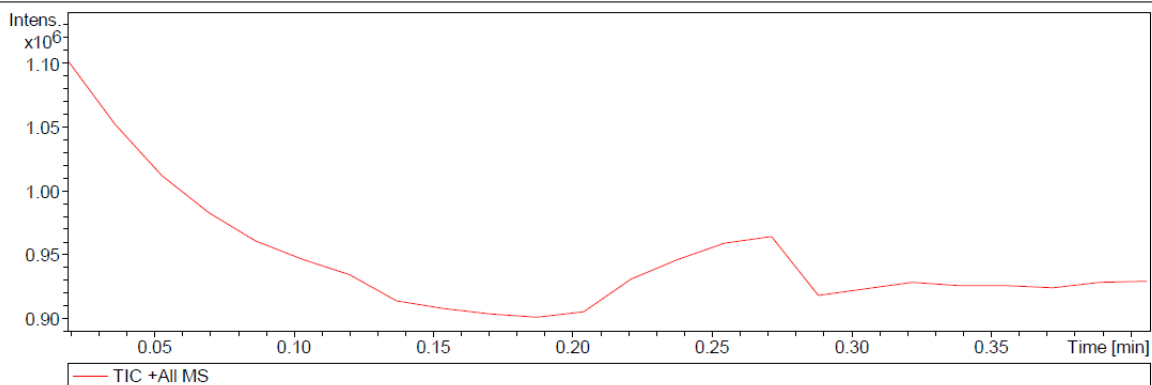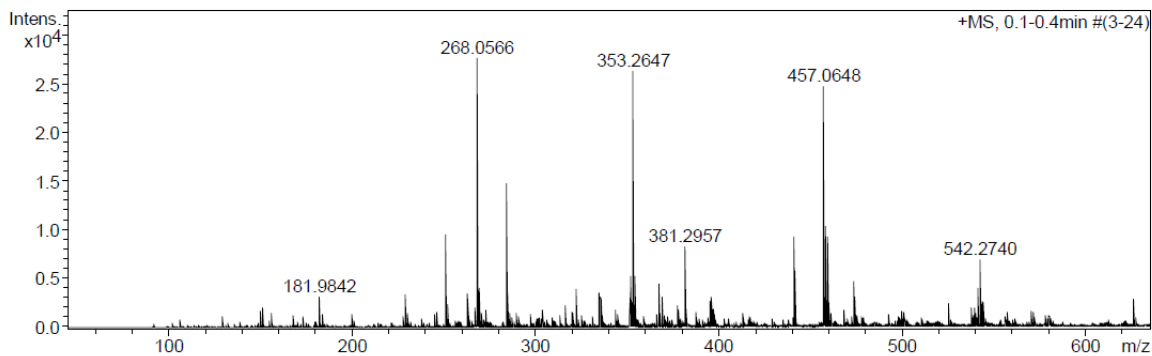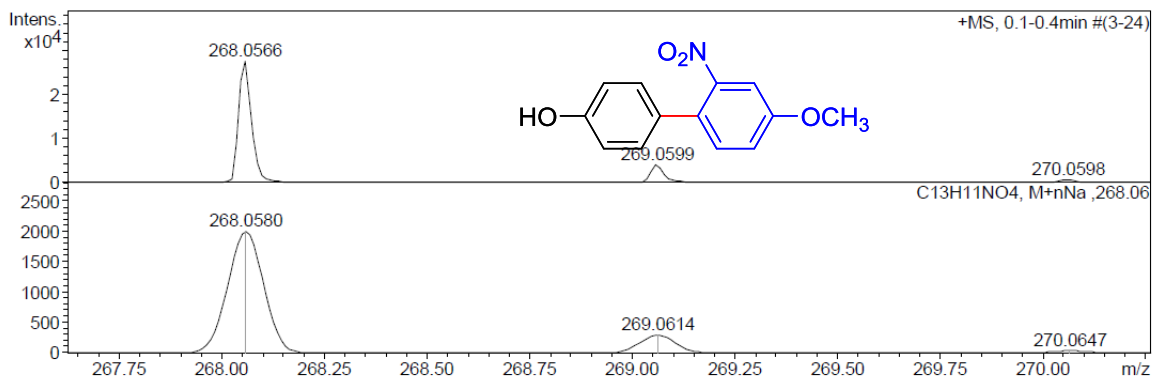

# Display Report

## Analysis Info

Analysis Name D:\Data\user data\2014\JAN\17 jan\Dr.S.Kumar-AK-5-24.d  
Method tune\_low.m  
Sample Name AK-5-24  
Comment

Acquisition Date 1/17/2014 12:38:51 PM

Operator Amit  
Instrument micrOTOF-Q II 10330

## Acquisition Parameter

|             |            |                       |          |                  |           |
|-------------|------------|-----------------------|----------|------------------|-----------|
| Source Type | ESI        | Ion Polarity          | Positive | Set Nebulizer    | 0.4 Bar   |
| Focus       | Not active | Set Capillary         | 4600 V   | Set Dry Heater   | 180 °C    |
| Scan Begin  | 50 m/z     | Set End Plate Offset  | -500 V   | Set Dry Gas      | 4.0 l/min |
| Scan End    | 3000 m/z   | Set Collision Cell RF | 50.0 Vpp | Set Divert Valve | Waste     |

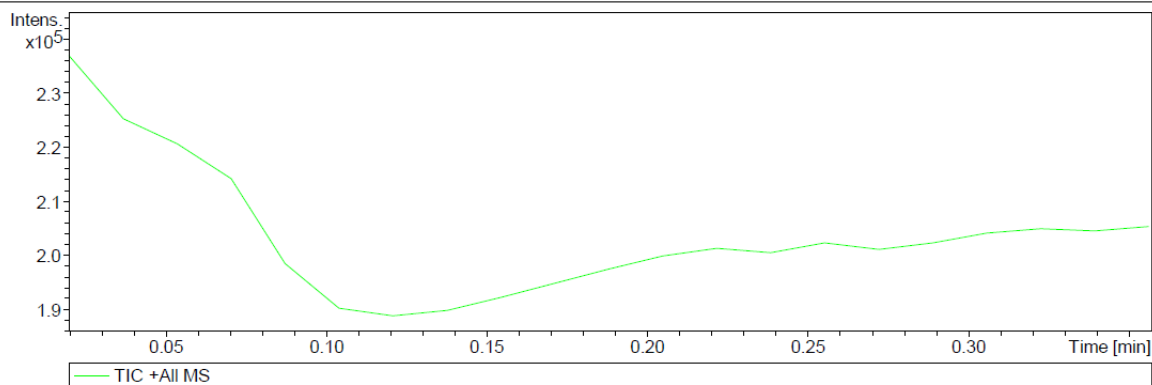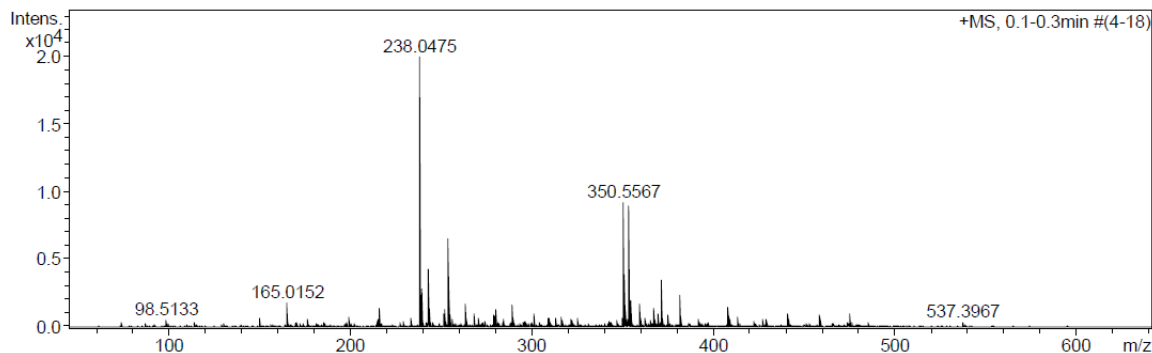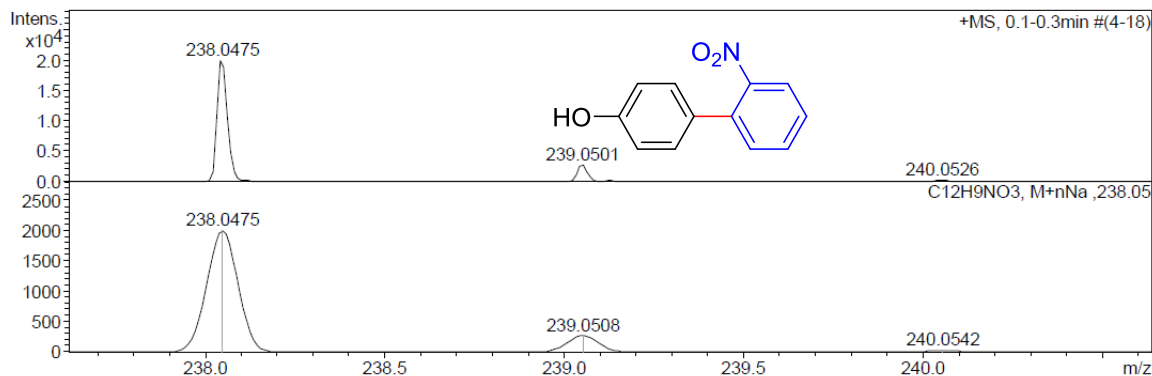



# Display Report

## Analysis Info

Analysis Name D:\Data\user data\2014\MARCH\18 MAR\Dr.Sangit-AK-5-25\_1-A,2\_01\_2109.d  
Method HRLCMS-20 Sept.m  
Sample Name Dr.Sangit-AK-5-25  
Comment

Acquisition Date 3/18/2014 12:04:33 PM  
Operator Amit  
Instrument micrOTOF-Q II 10330

## Acquisition Parameter

|             |          |                       |           |                  |           |
|-------------|----------|-----------------------|-----------|------------------|-----------|
| Source Type | ESI      | Ion Polarity          | Positive  | Set Nebulizer    | 1.2 Bar   |
| Focus       | Active   | Set Capillary         | 4500 V    | Set Dry Heater   | 200 °C    |
| Scan Begin  | 50 m/z   | Set End Plate Offset  | -500 V    | Set Dry Gas      | 7.0 l/min |
| Scan End    | 3000 m/z | Set Collision Cell RF | 130.0 Vpp | Set Divert Valve | Waste     |

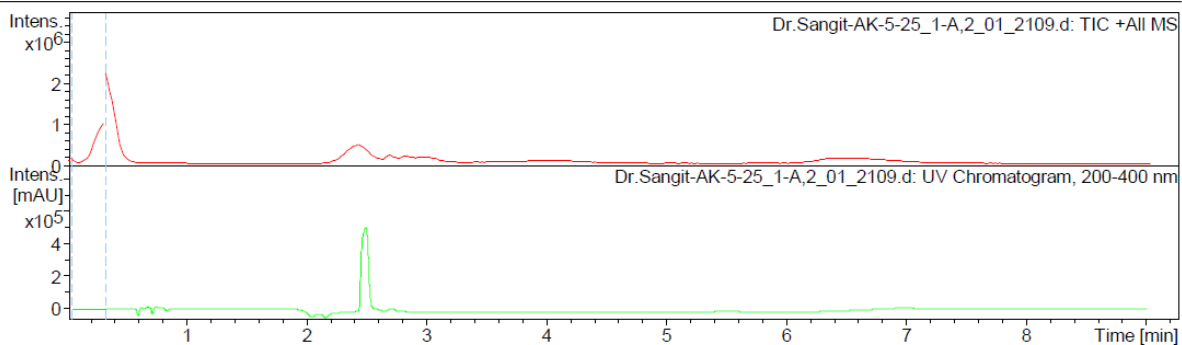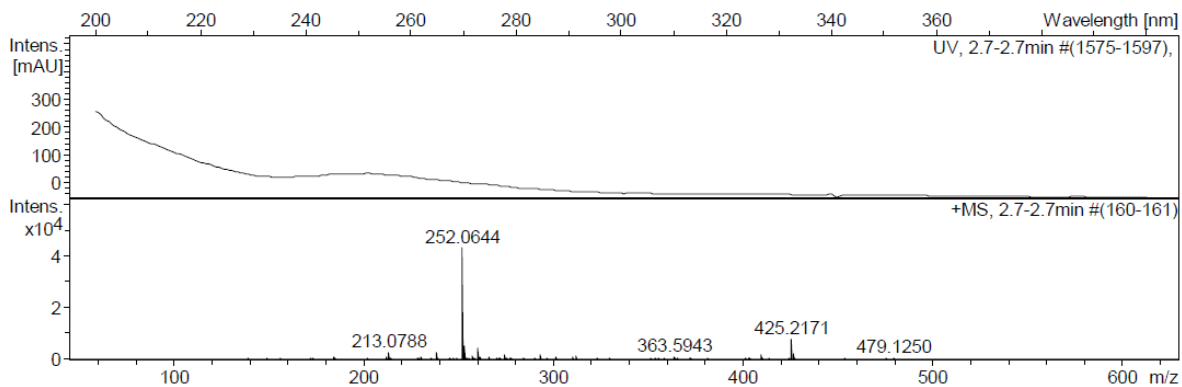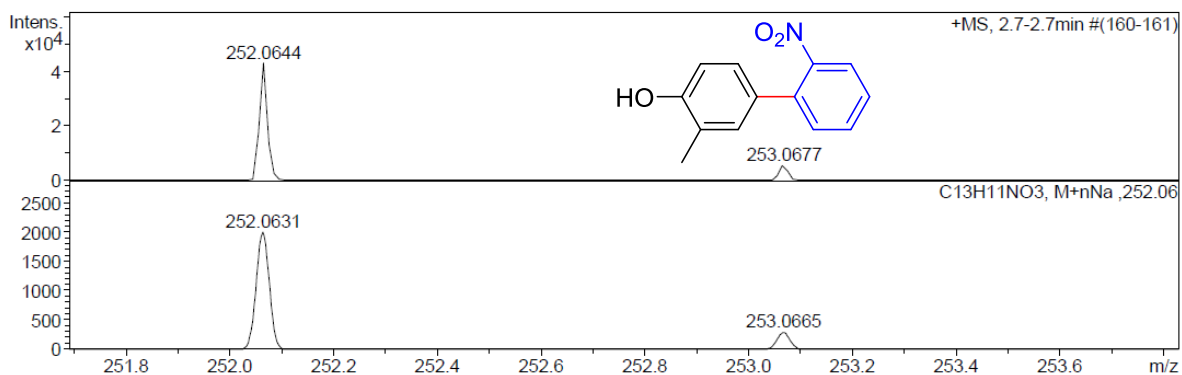

# Display Report

## Analysis Info

Analysis Name D:\Data\user data\2013\DEC\26 dec\Dr.S.Kumar-AK-4-157II-1.d  
Method tune\_low.m  
Sample Name AK-4-157II  
Comment

Acquisition Date 12/26/2013 1:25:59 PM  
Operator Amit  
Instrument micrOTOF-Q II 10330

## Acquisition Parameter

|             |            |                       |           |                  |           |
|-------------|------------|-----------------------|-----------|------------------|-----------|
| Source Type | ESI        | Ion Polarity          | Positive  | Set Nebulizer    | 0.4 Bar   |
| Focus       | Not active | Set Capillary         | 4600 V    | Set Dry Heater   | 180 °C    |
| Scan Begin  | 50 m/z     | Set End Plate Offset  | -500 V    | Set Dry Gas      | 4.0 l/min |
| Scan End    | 3000 m/z   | Set Collision Cell RF | 130.0 Vpp | Set Divert Valve | Waste     |

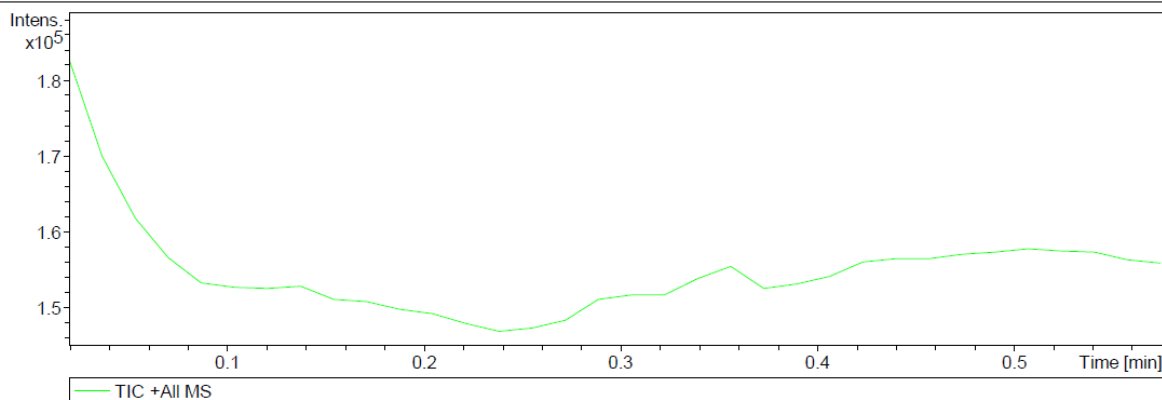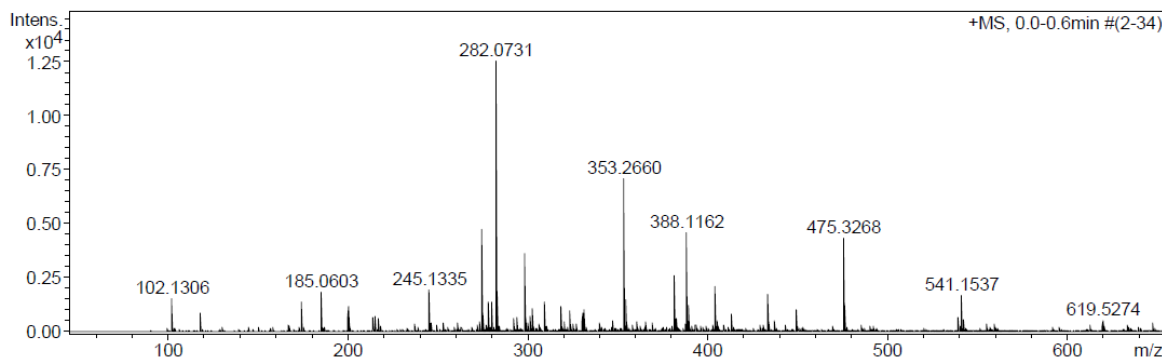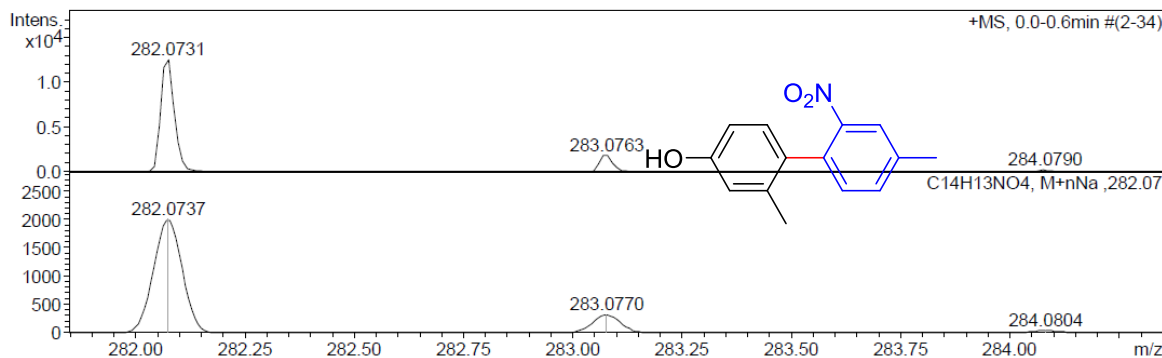

# Display Report

## Analysis Info

Analysis Name D:\Data\user data\2013\DEC\05 dec\Dr.S.Kumar-AY-97\_1-A,5\_01\_1637.d  
Method HRLCMS-20 Sept.m  
Sample Name Dr.S.Kumar-AY-97  
Comment

Acquisition Date 12/5/2013 1:51:43 PM  
Operator Amit  
Instrument micrOTOF-Q II 10330

## Acquisition Parameter

|             |          |                       |           |                  |           |
|-------------|----------|-----------------------|-----------|------------------|-----------|
| Source Type | ESI      | Ion Polarity          | Negative  | Set Nebulizer    | 1.2 Bar   |
| Focus       | Active   | Set Capillary         | 2500 V    | Set Dry Heater   | 200 °C    |
| Scan Begin  | 50 m/z   | Set End Plate Offset  | -500 V    | Set Dry Gas      | 7.0 l/min |
| Scan End    | 3000 m/z | Set Collision Cell RF | 130.0 Vpp | Set Divert Valve | Waste     |

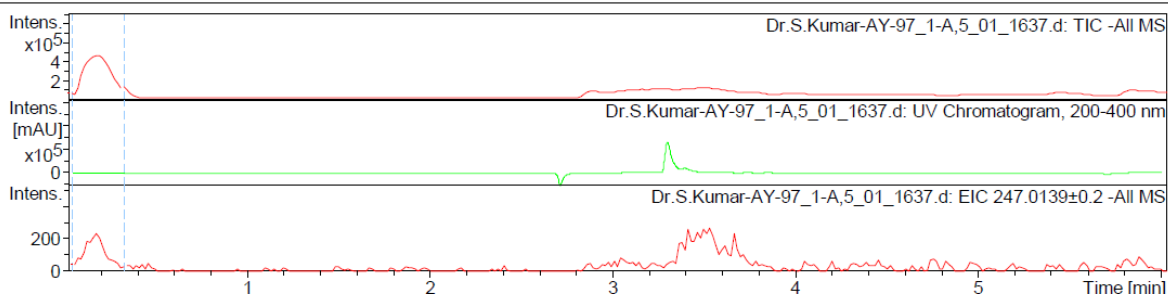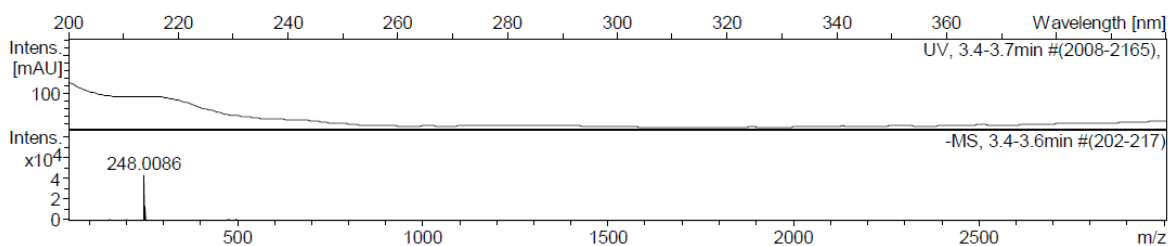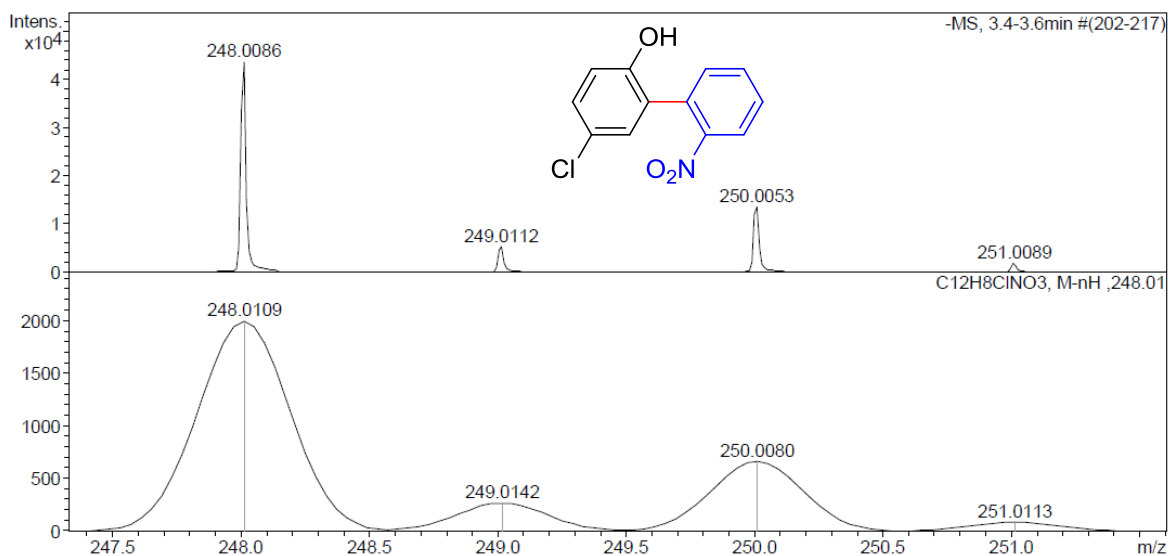

# Display Report

## Analysis Info

Analysis Name D:\Data\user data\2014\MARCH\18 MAR\Dr.Sangit-AK-5-98\_1-A,4\_01\_2111.d  
Method HRLCMS-20 Sept.m  
Sample Name Dr.Sangit-AK-5-98  
Comment  
Acquisition Date 3/18/2014 12:24:54 PM  
Operator Amit  
Instrument micrOTOF-Q II 10330

## Acquisition Parameter

|             |          |                       |           |                  |           |
|-------------|----------|-----------------------|-----------|------------------|-----------|
| Source Type | ESI      | Ion Polarity          | Positive  | Set Nebulizer    | 1.2 Bar   |
| Focus       | Active   | Set Capillary         | 4500 V    | Set Dry Heater   | 200 °C    |
| Scan Begin  | 50 m/z   | Set End Plate Offset  | -500 V    | Set Dry Gas      | 7.0 l/min |
| Scan End    | 3000 m/z | Set Collision Cell RF | 130.0 Vpp | Set Divert Valve | Waste     |

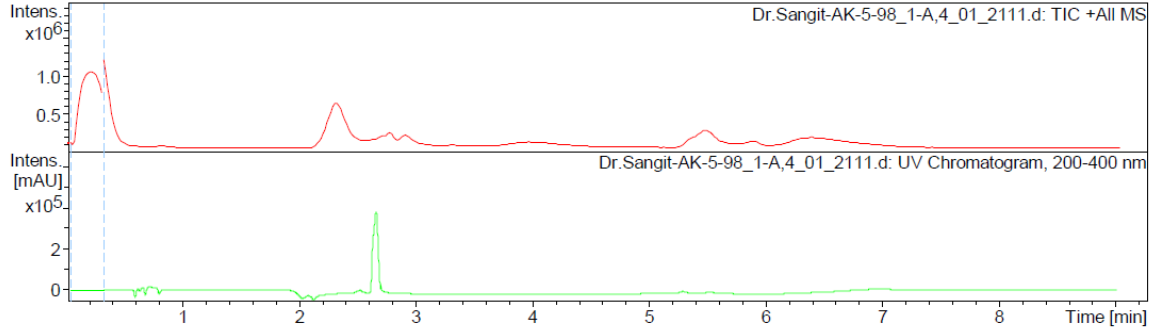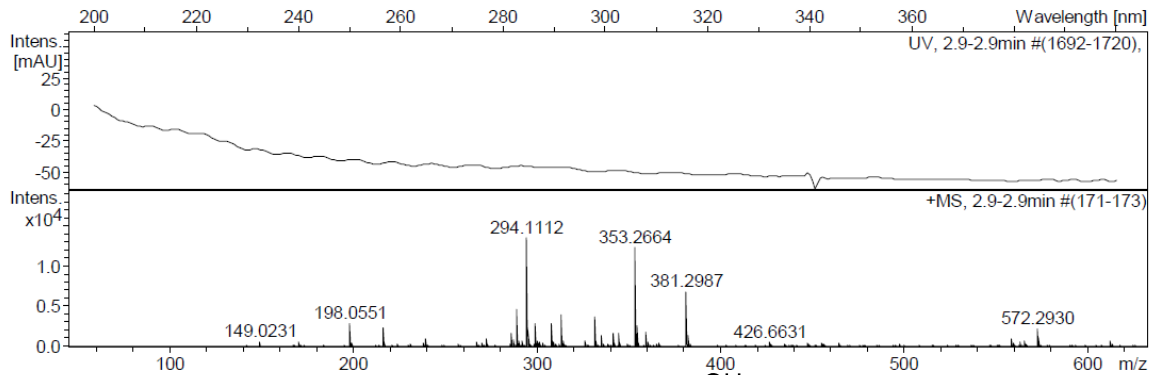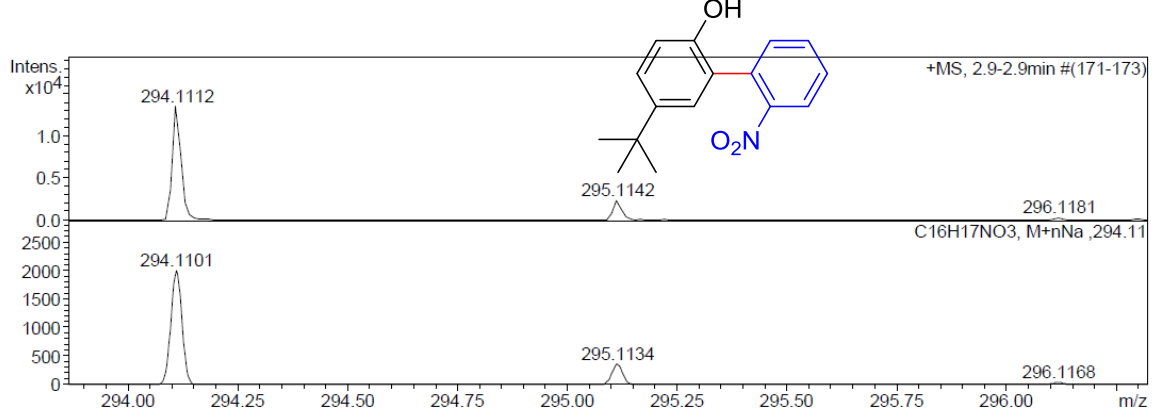

# Display Report

## Analysis Info

Analysis Name D:\Data\user data\2013\NOV\20 NOV\Dr.S.Kumar-AY-50\_1-A,3\_01\_1510.d  
Method HRLCMS-6 FEB.m  
Sample Name Dr.S.Kumar-AY-50  
Comment

Acquisition Date 11/20/2013 4:52:15 PM  
Operator Amit  
Instrument micrOTOF-Q II 10330

## Acquisition Parameter

|             |          |                       |           |                  |           |
|-------------|----------|-----------------------|-----------|------------------|-----------|
| Source Type | ESI      | Ion Polarity          | Negative  | Set Nebulizer    | 1.2 Bar   |
| Focus       | Active   | Set Capillary         | 2500 V    | Set Dry Heater   | 200 °C    |
| Scan Begin  | 50 m/z   | Set End Plate Offset  | -500 V    | Set Dry Gas      | 7.0 l/min |
| Scan End    | 3000 m/z | Set Collision Cell RF | 130.0 Vpp | Set Divert Valve | Waste     |

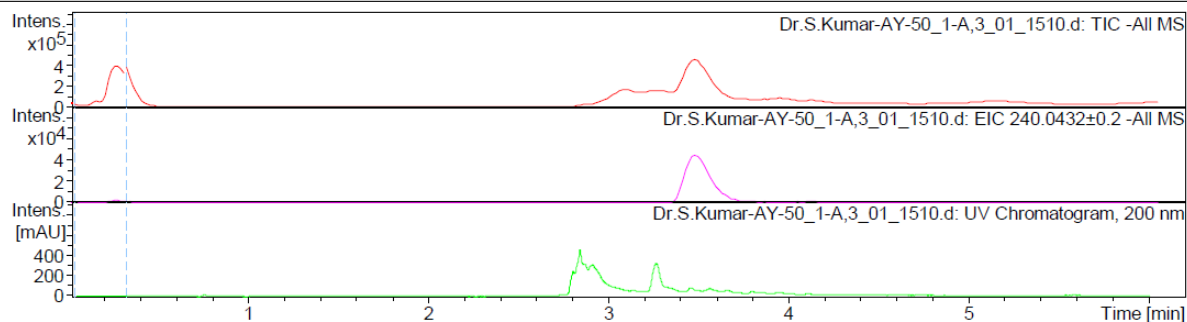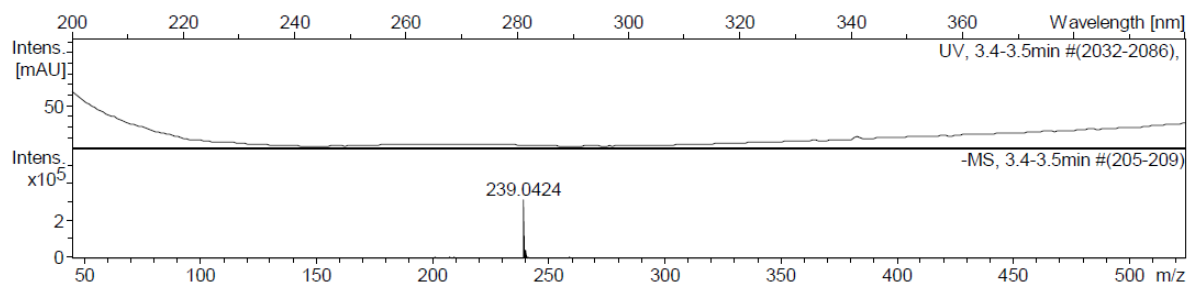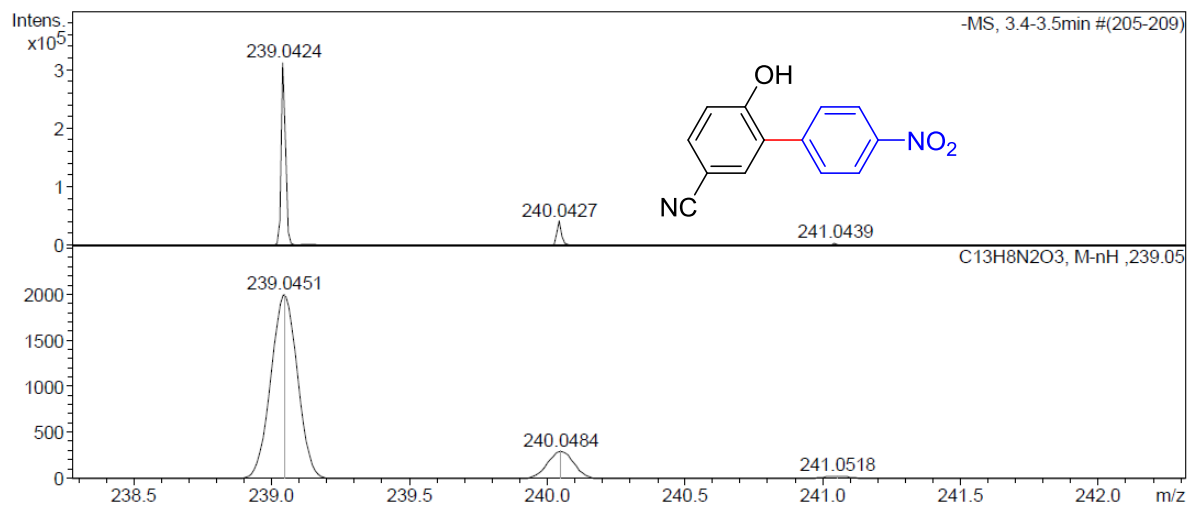

# Display Report

## Analysis Info

Analysis Name D:\Data\user data\2013\DEC\26 dec\Dr.S.Kumar-AK-4-157II-1.d  
Method tune\_low.m  
Sample Name AK-4-157II  
Comment

Acquisition Date 12/26/2013 1:25:59 PM

Operator Amit  
Instrument micrOTOF-Q II 10330

## Acquisition Parameter

|             |            |                       |           |                  |           |
|-------------|------------|-----------------------|-----------|------------------|-----------|
| Source Type | ESI        | Ion Polarity          | Positive  | Set Nebulizer    | 0.4 Bar   |
| Focus       | Not active | Set Capillary         | 4600 V    | Set Dry Heater   | 180 °C    |
| Scan Begin  | 50 m/z     | Set End Plate Offset  | -500 V    | Set Dry Gas      | 4.0 l/min |
| Scan End    | 3000 m/z   | Set Collision Cell RF | 130.0 Vpp | Set Divert Valve | Waste     |

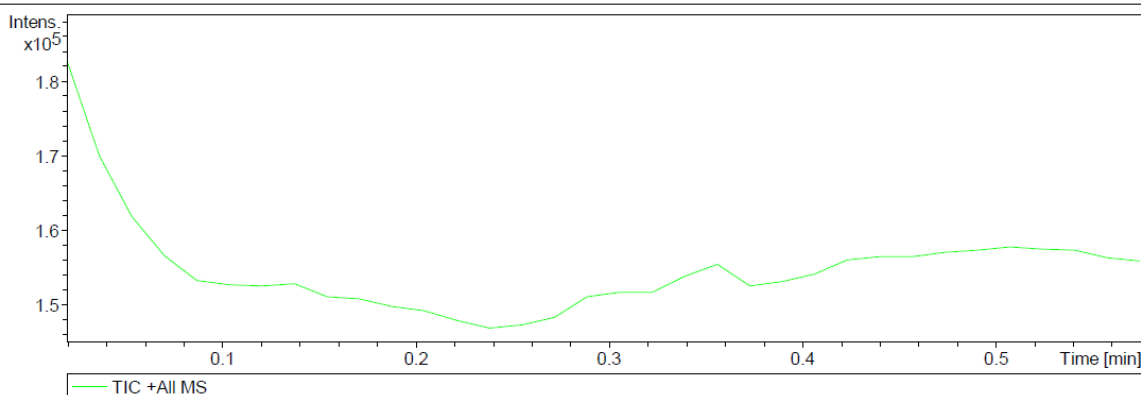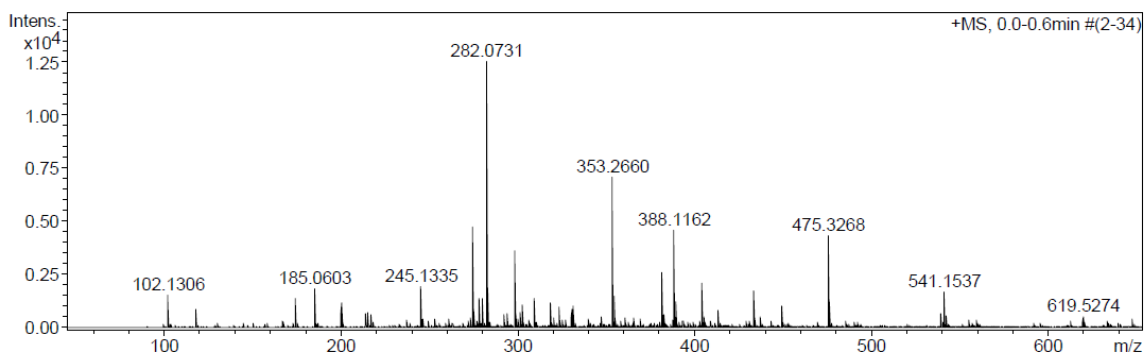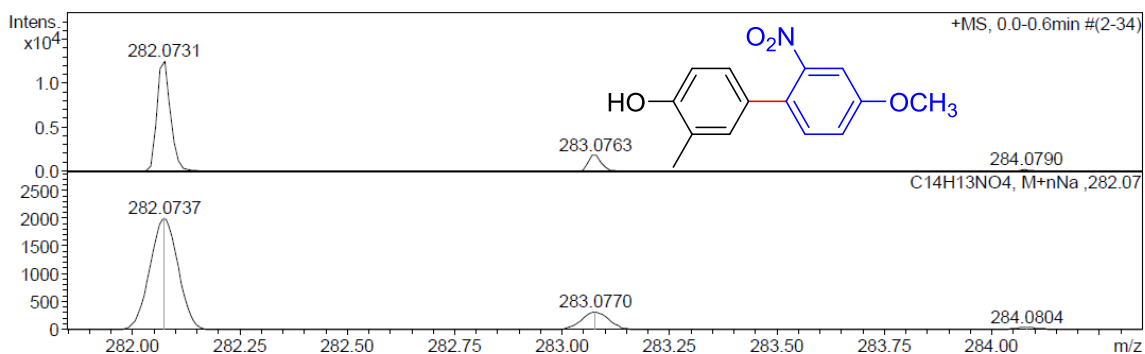

# Display Report

## Analysis Info

Analysis Name D:\Data\user data\2014\JAN\01\jan\Dr.S.kumar-AK-4-188.d  
Method tune\_low.m  
Sample Name AK-4-188  
Comment

Acquisition Date 1/1/2014 3:12:04 PM  
Operator Amit  
Instrument micrOTOF-Q II 10330

## Acquisition Parameter

|             |            |                       |           |                  |           |
|-------------|------------|-----------------------|-----------|------------------|-----------|
| Source Type | ESI        | Ion Polarity          | Positive  | Set Nebulizer    | 0.4 Bar   |
| Focus       | Not active | Set Capillary         | 4600 V    | Set Dry Heater   | 180 °C    |
| Scan Begin  | 50 m/z     | Set End Plate Offset  | -500 V    | Set Dry Gas      | 4.0 l/min |
| Scan End    | 3000 m/z   | Set Collision Cell RF | 130.0 Vpp | Set Divert Valve | Waste     |

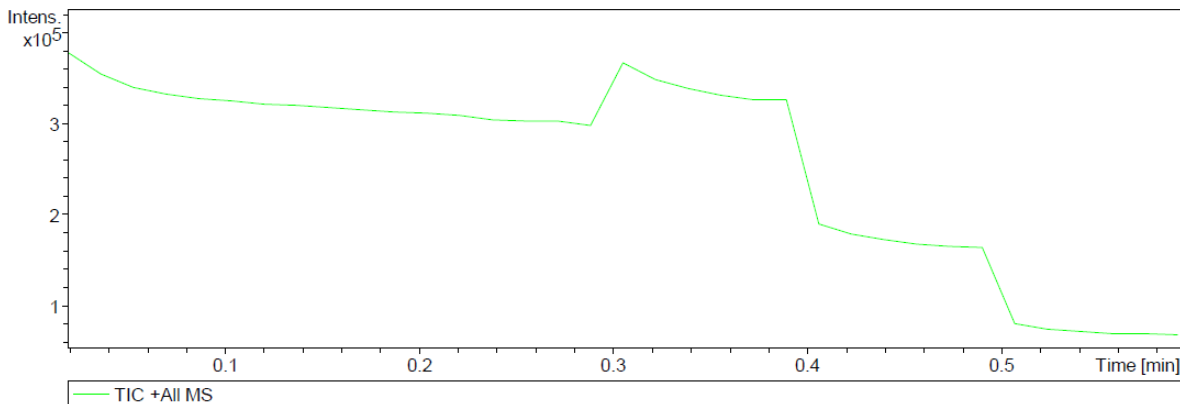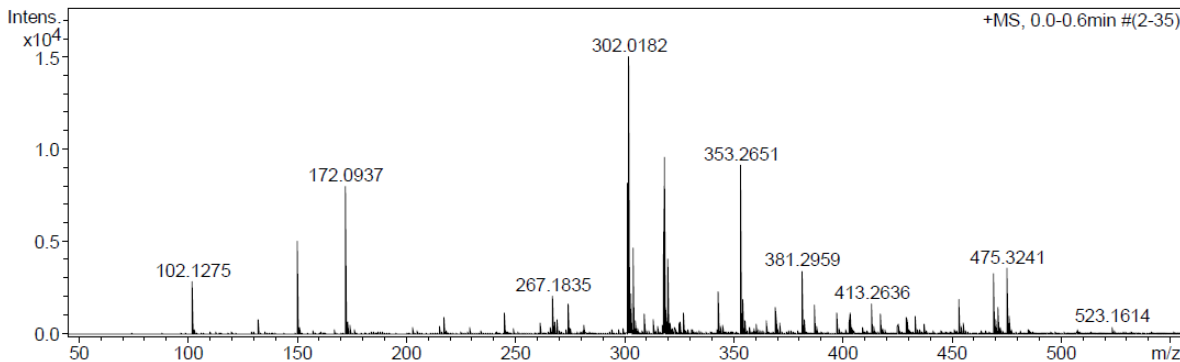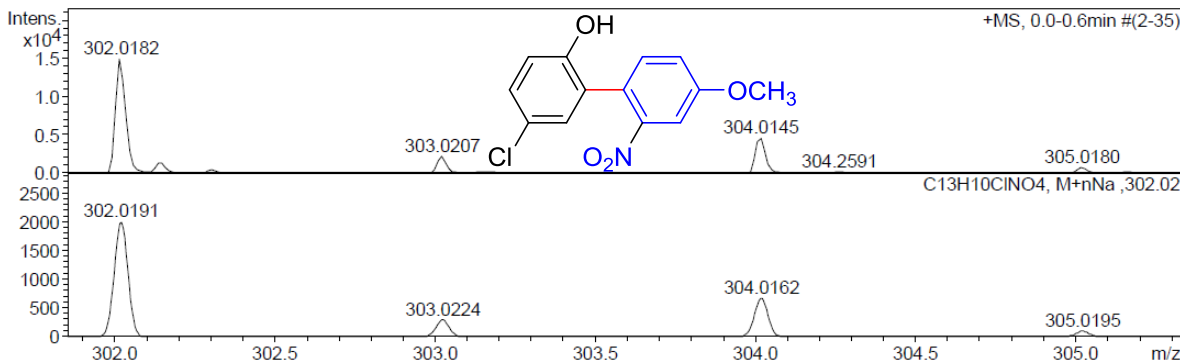

# Display Report

## Analysis Info

Analysis Name D:\Data\user data\2013\DEC\02 DEC\Dr.S.Kumar-AY-99-I\_1-B,1\_01\_1622.d  
Method HRLCMS-6 FEB.m  
Sample Name Dr.S.Kumar-AY-99-I  
Comment

Acquisition Date 12/2/2013 1:17:37 PM  
Operator Amit  
Instrument micrOTOF-Q II 10330

## Acquisition Parameter

|             |          |                       |           |                  |           |
|-------------|----------|-----------------------|-----------|------------------|-----------|
| Source Type | ESI      | Ion Polarity          | Negative  | Set Nebulizer    | 1.2 Bar   |
| Focus       | Active   | Set Capillary         | 2500 V    | Set Dry Heater   | 200 °C    |
| Scan Begin  | 50 m/z   | Set End Plate Offset  | -500 V    | Set Dry Gas      | 7.0 l/min |
| Scan End    | 3000 m/z | Set Collision Cell RF | 130.0 Vpp | Set Divert Valve | Waste     |

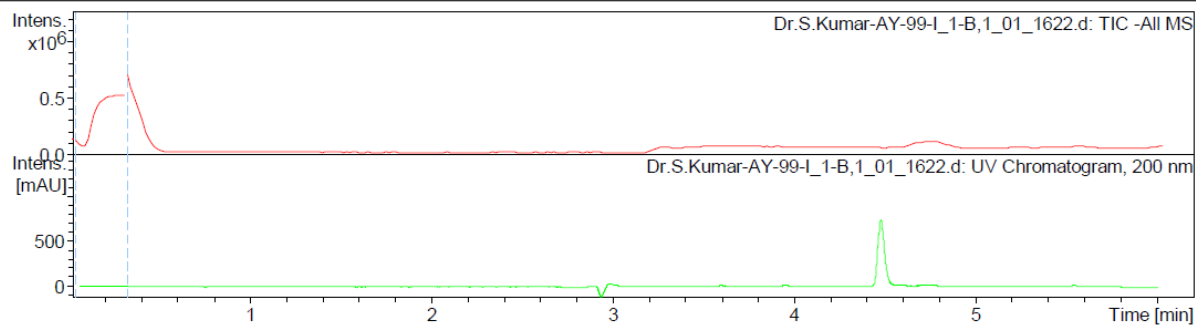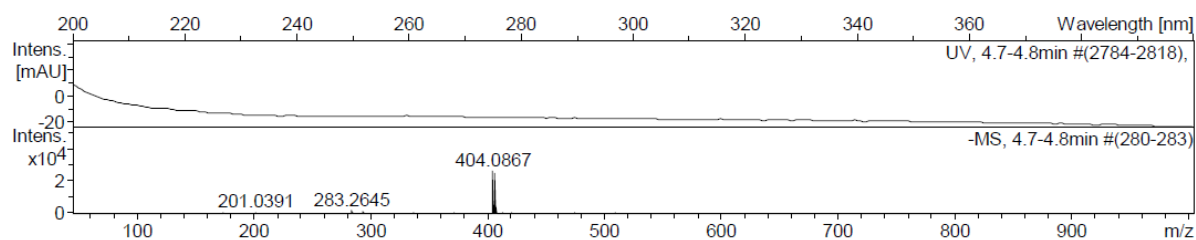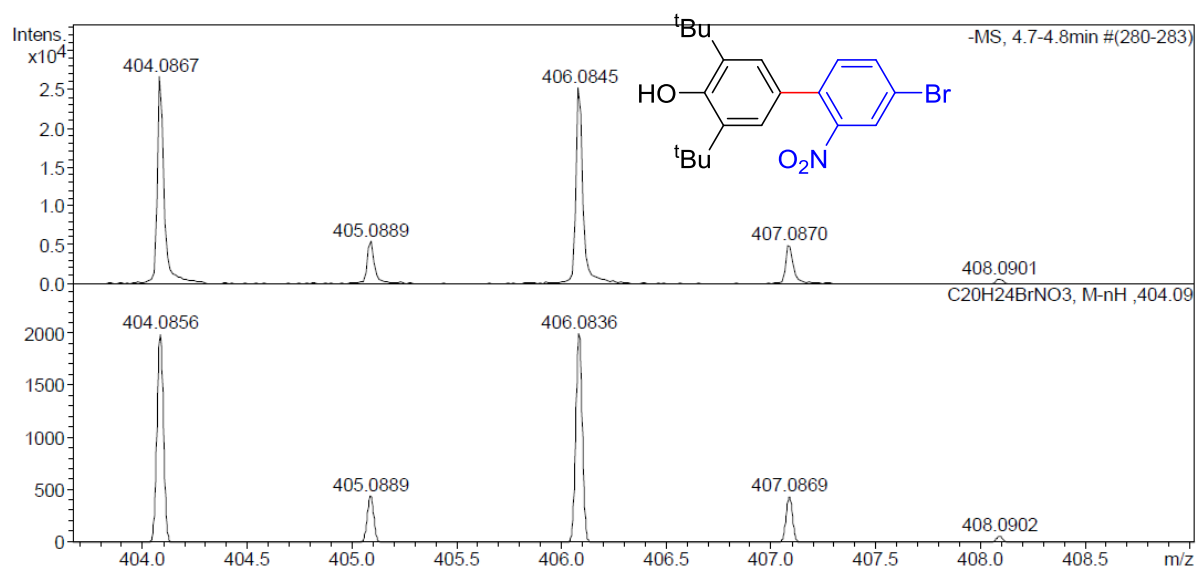



# Display Report

## Analysis Info

Analysis Name D:\Data\user data\2014\MARCH\18 MAR\Dr.Sangit-AK-5-193\_1-A,5\_01\_2112.d  
Method HRLCMS-20 Sept.m  
Sample Name Dr.Sangit-AK-5-193  
Comment

Acquisition Date 3/18/2014 12:35:03 PM  
Operator Amit  
Instrument micrOTOF-Q II 10330

## Acquisition Parameter

|             |          |                       |           |                  |           |
|-------------|----------|-----------------------|-----------|------------------|-----------|
| Source Type | ESI      | Ion Polarity          | Positive  | Set Nebulizer    | 1.2 Bar   |
| Focus       | Active   | Set Capillary         | 4500 V    | Set Dry Heater   | 200 °C    |
| Scan Begin  | 50 m/z   | Set End Plate Offset  | -500 V    | Set Dry Gas      | 7.0 l/min |
| Scan End    | 3000 m/z | Set Collision Cell RF | 130.0 Vpp | Set Divert Valve | Waste     |

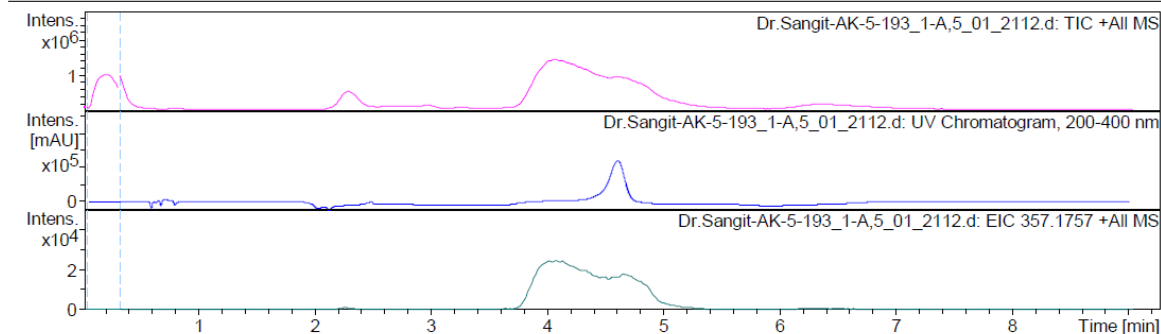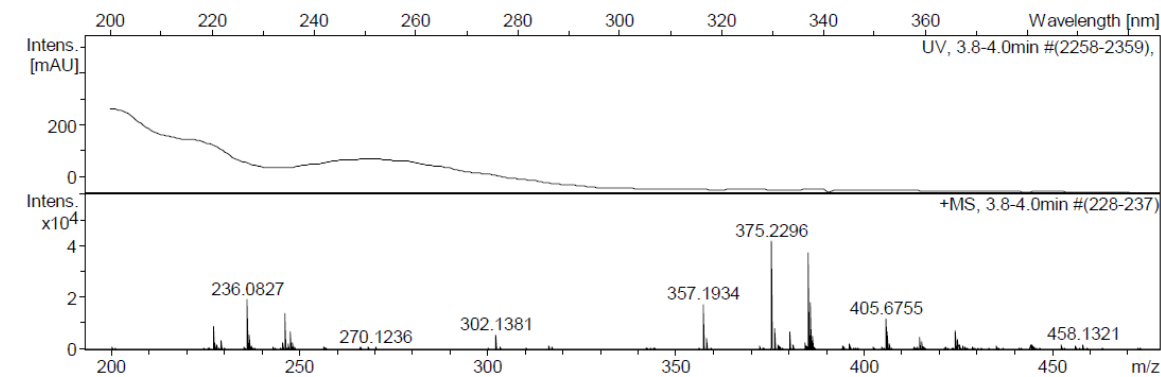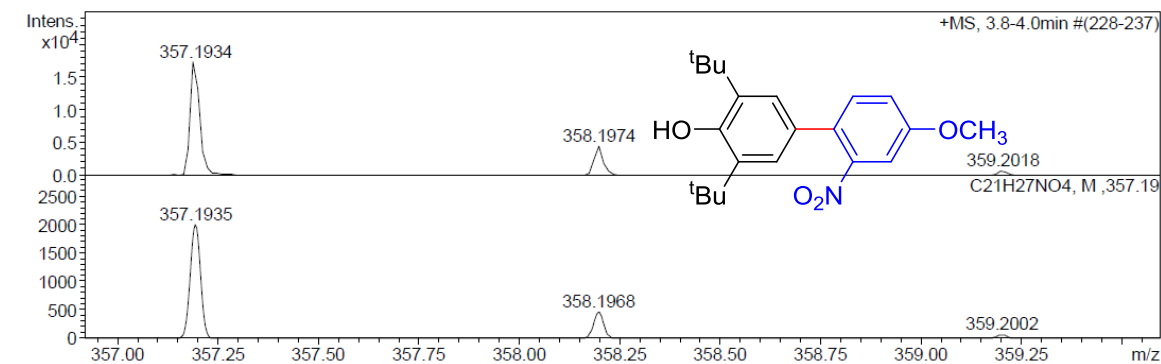

# Display Report

## Analysis Info

Analysis Name D:\Data\user data\2013\DEC\05 dec\Dr.S.Kumar-AY-98\_1-A,3\_01\_1632.d Acquisition Date 12/5/2013 1:15:04 PM  
Method HRLCMS-20 Sept.m Operator Amit  
Sample Name Dr.S.Kumar-AY-98 Instrument micrOTOF-Q II 10330  
Comment

## Acquisition Parameter

|             |          |                       |           |                  |           |
|-------------|----------|-----------------------|-----------|------------------|-----------|
| Source Type | ESI      | Ion Polarity          | Positive  | Set Nebulizer    | 1.2 Bar   |
| Focus       | Active   | Set Capillary         | 4500 V    | Set Dry Heater   | 200 °C    |
| Scan Begin  | 50 m/z   | Set End Plate Offset  | -500 V    | Set Dry Gas      | 7.0 l/min |
| Scan End    | 3000 m/z | Set Collision Cell RF | 130.0 Vpp | Set Divert Valve | Waste     |

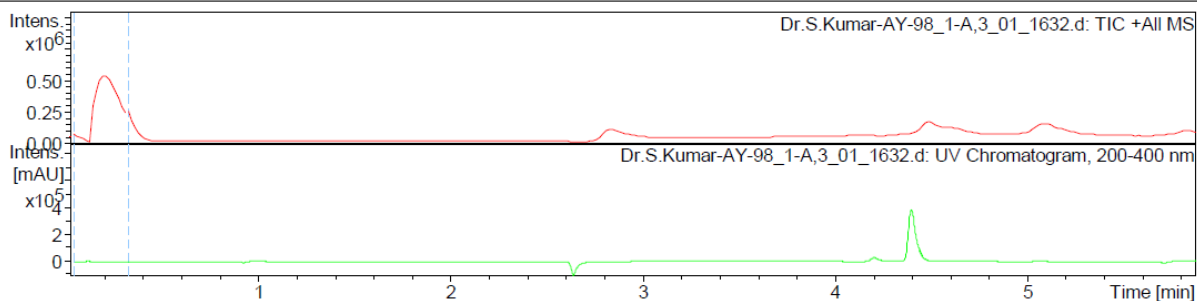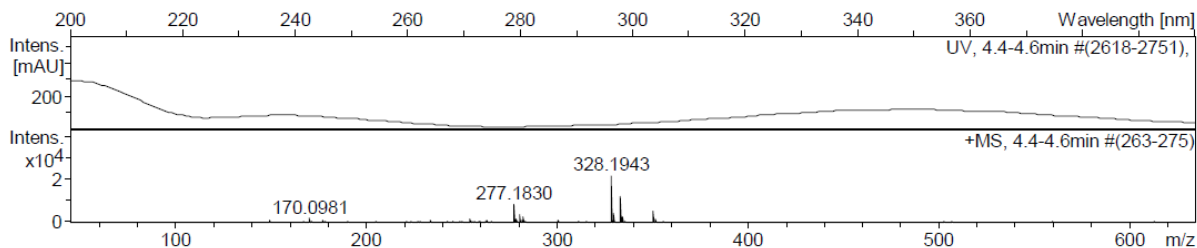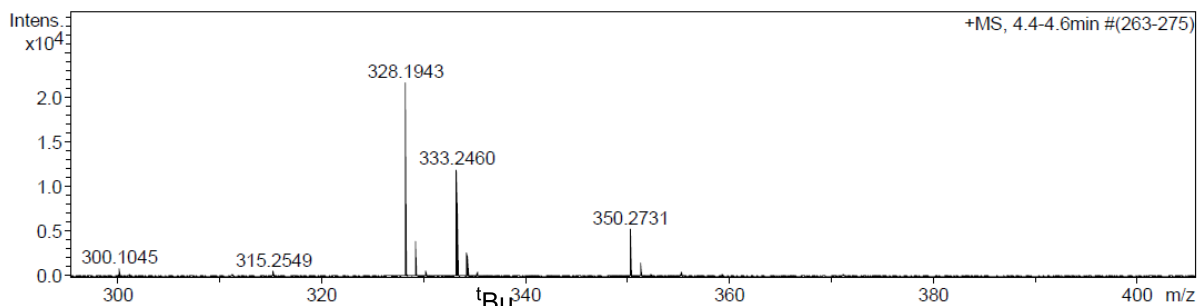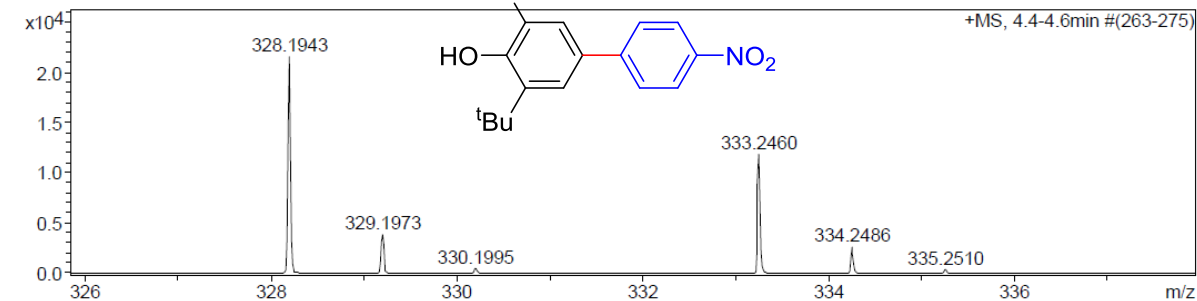

# Display Report

## Analysis Info

Analysis Name D:\Data\user data\2014\JAN\06 jan\Dr.S.Kumar-AK-5-53.d  
Method tune\_low.m  
Sample Name AK-5-53  
Comment

Acquisition Date 1/6/2014 1:13:48 PM  
Operator Amit  
Instrument micrOTOF-Q II 10330

## Acquisition Parameter

|             |            |                       |           |                  |           |
|-------------|------------|-----------------------|-----------|------------------|-----------|
| Source Type | ESI        | Ion Polarity          | Positive  | Set Nebulizer    | 0.4 Bar   |
| Focus       | Not active | Set Capillary         | 4600 V    | Set Dry Heater   | 180 °C    |
| Scan Begin  | 50 m/z     | Set End Plate Offset  | -500 V    | Set Dry Gas      | 4.0 l/min |
| Scan End    | 3000 m/z   | Set Collision Cell RF | 130.0 Vpp | Set Divert Valve | Waste     |

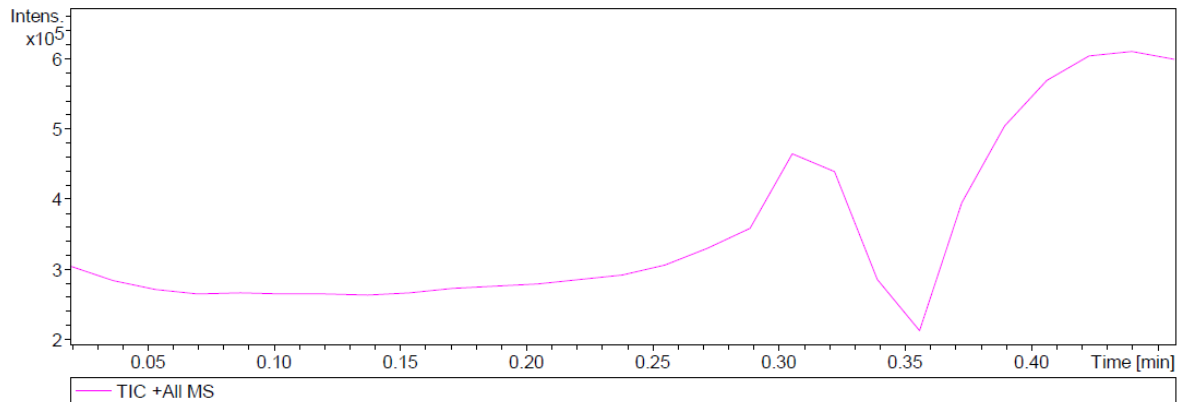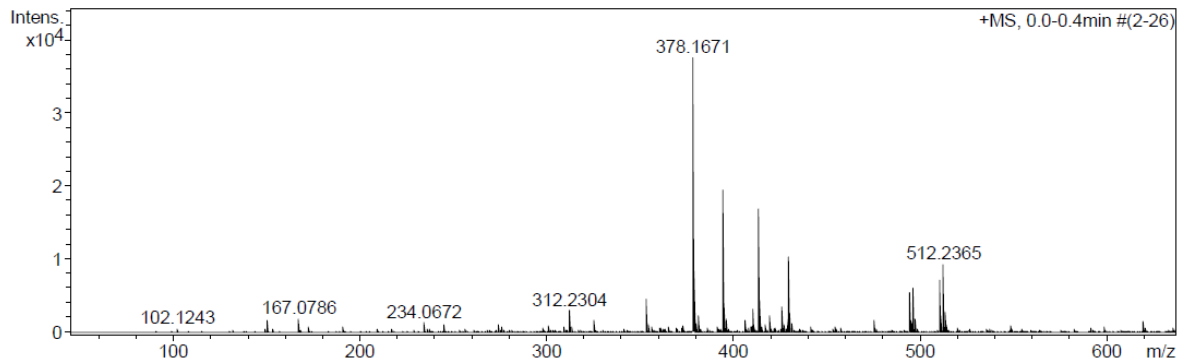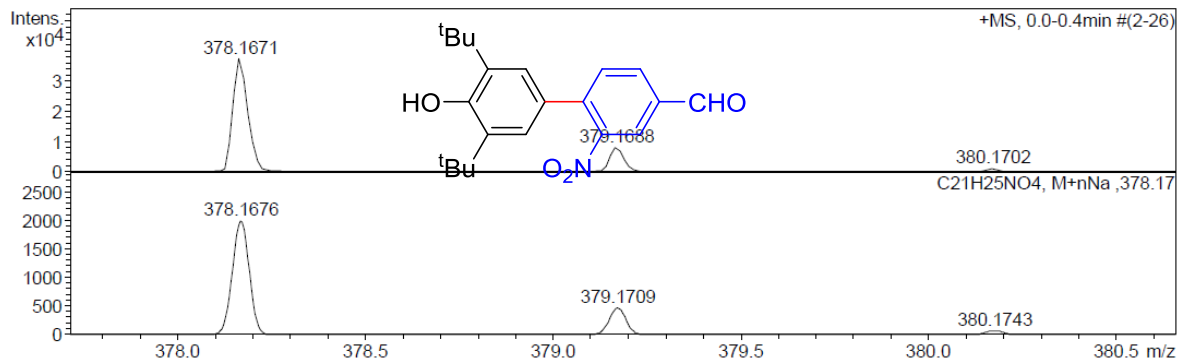

# Display Report

## Analysis Info

Analysis Name D:\Data\user data\2014\JAN\09 jan\Dr.S.Kumar-AK-5-59.d  
Method tune\_low.m  
Sample Name AK-5-59  
Comment

Acquisition Date 1/9/2014 2:51:59 PM  
Operator Amit  
Instrument micrOTOF-Q II 10330

## Acquisition Parameter

|             |            |                       |           |                  |           |
|-------------|------------|-----------------------|-----------|------------------|-----------|
| Source Type | ESI        | Ion Polarity          | Positive  | Set Nebulizer    | 0.4 Bar   |
| Focus       | Not active | Set Capillary         | 4600 V    | Set Dry Heater   | 180 °C    |
| Scan Begin  | 50 m/z     | Set End Plate Offset  | -500 V    | Set Dry Gas      | 4.0 l/min |
| Scan End    | 3000 m/z   | Set Collision Cell RF | 130.0 Vpp | Set Divert Valve | Waste     |

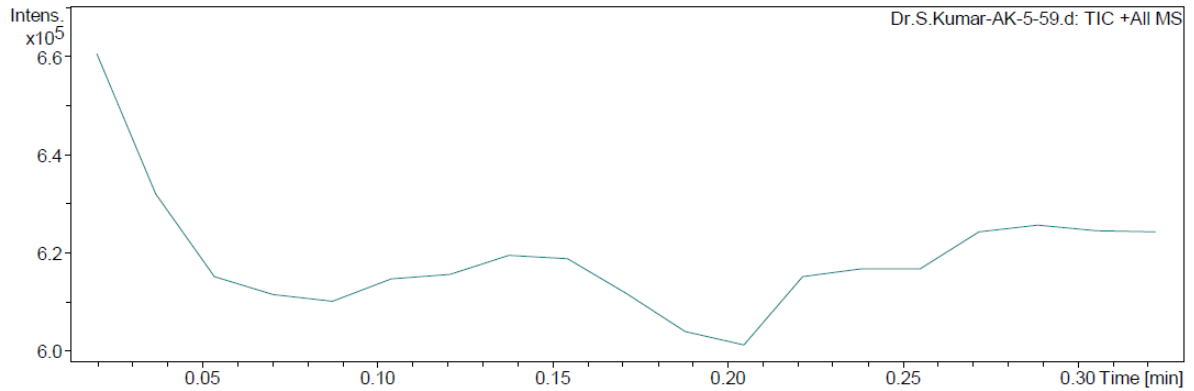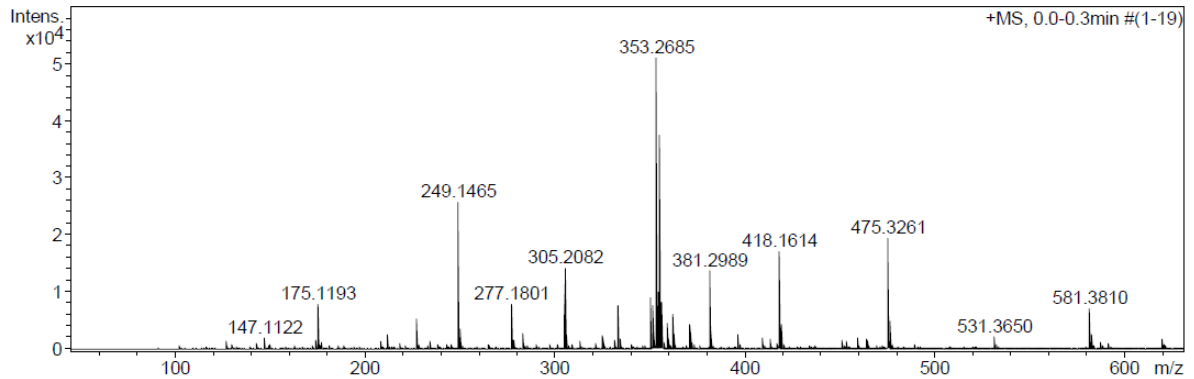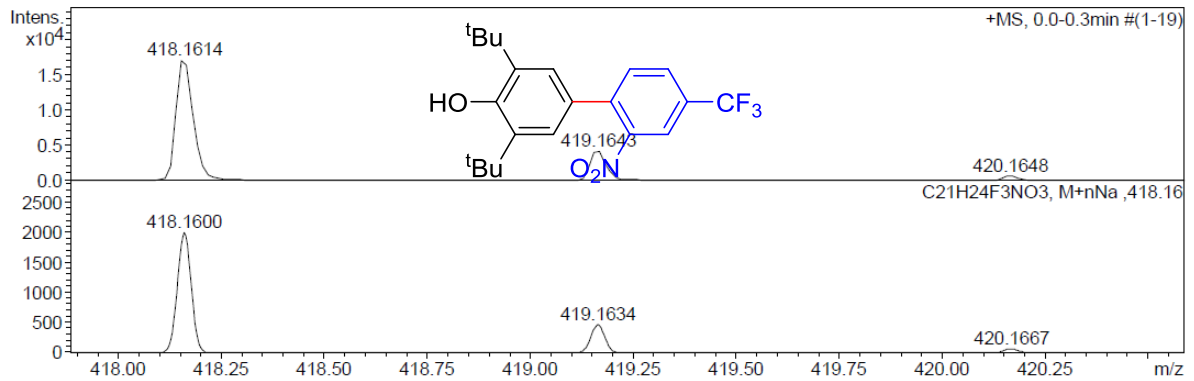

# Display Report

## Analysis Info

Analysis Name D:\Data\user data\2014\JAN\09 jan\Dr.S.Kumar-AK-5-60.d  
Method tune\_low.m  
Sample Name AK-5-60  
Comment

Acquisition Date 1/9/2014 2:55:59 PM

Operator Amit  
Instrument micrOTOF-Q II 10330

## Acquisition Parameter

|             |            |                       |           |                  |           |
|-------------|------------|-----------------------|-----------|------------------|-----------|
| Source Type | ESI        | Ion Polarity          | Positive  | Set Nebulizer    | 0.4 Bar   |
| Focus       | Not active | Set Capillary         | 4600 V    | Set Dry Heater   | 180 °C    |
| Scan Begin  | 50 m/z     | Set End Plate Offset  | -500 V    | Set Dry Gas      | 4.0 l/min |
| Scan End    | 3000 m/z   | Set Collision Cell RF | 130.0 Vpp | Set Divert Valve | Waste     |

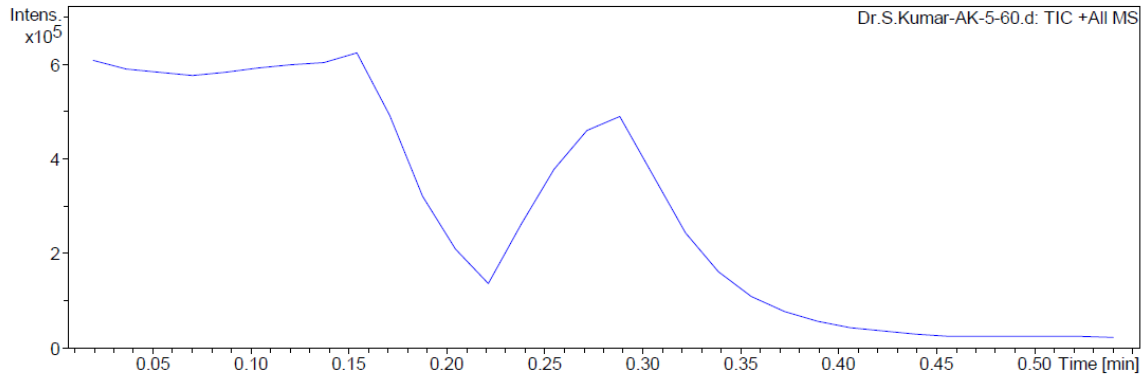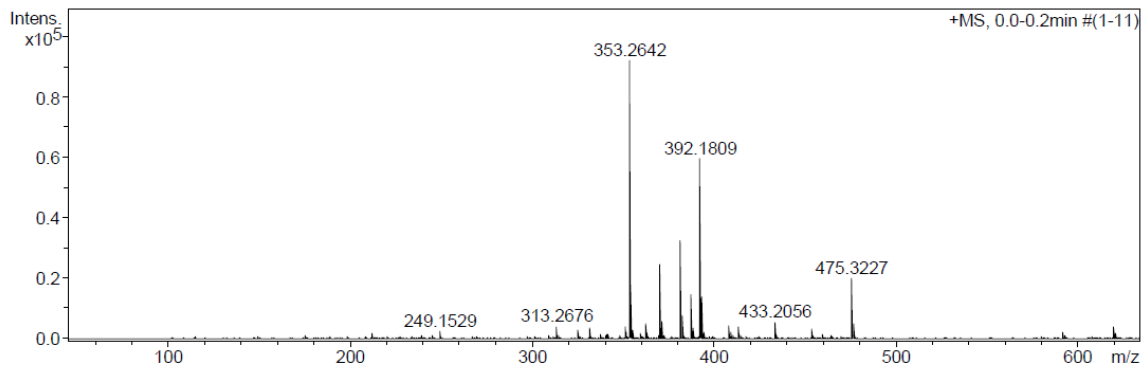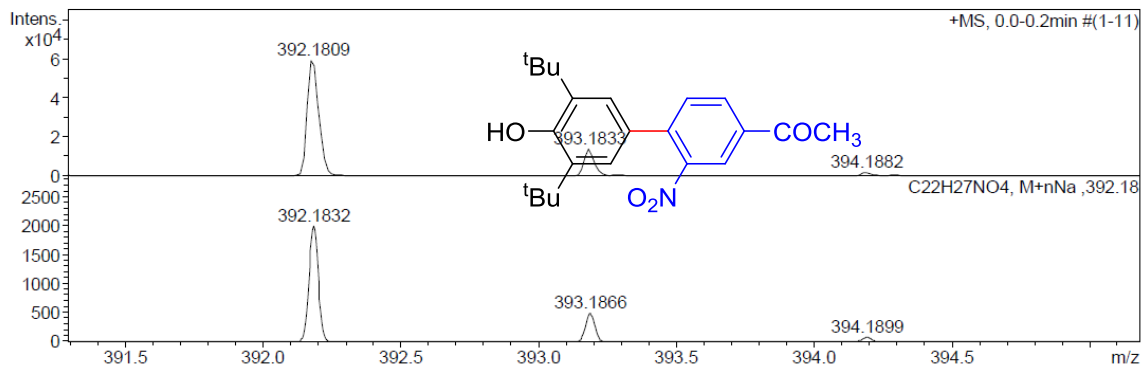

# Display Report

## Analysis Info

Analysis Name D:\Data\user data\2014\MARCH\18 MAR\Dr.Sangit-AK-AY-101\_1-A,6\_01\_2114.d  
Method HRLCMS-20 Sept.m  
Sample Name Dr.Sangit-AK-AY-101  
Comment

Acquisition Date 3/18/2014 12:55:27 PM  
Operator Amit  
Instrument micrOTOF-Q II 10330

## Acquisition Parameter

|             |          |                       |           |                  |           |
|-------------|----------|-----------------------|-----------|------------------|-----------|
| Source Type | ESI      | Ion Polarity          | Positive  | Set Nebulizer    | 1.2 Bar   |
| Focus       | Active   | Set Capillary         | 4500 V    | Set Dry Heater   | 200 °C    |
| Scan Begin  | 50 m/z   | Set End Plate Offset  | -500 V    | Set Dry Gas      | 7.0 l/min |
| Scan End    | 3000 m/z | Set Collision Cell RF | 130.0 Vpp | Set Divert Valve | Waste     |

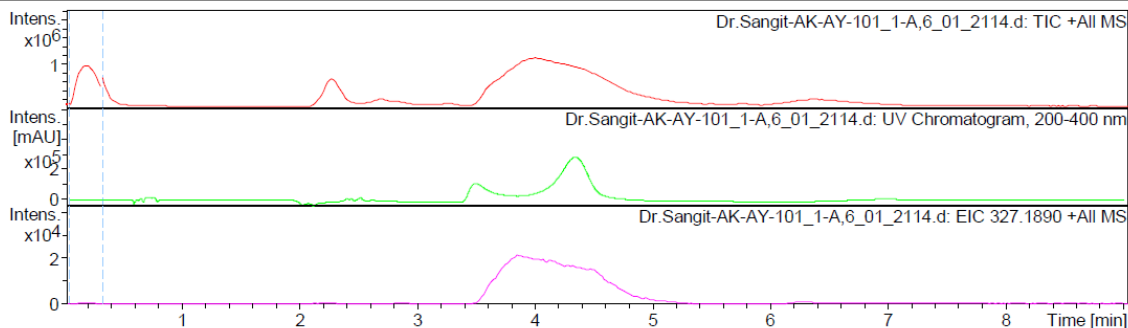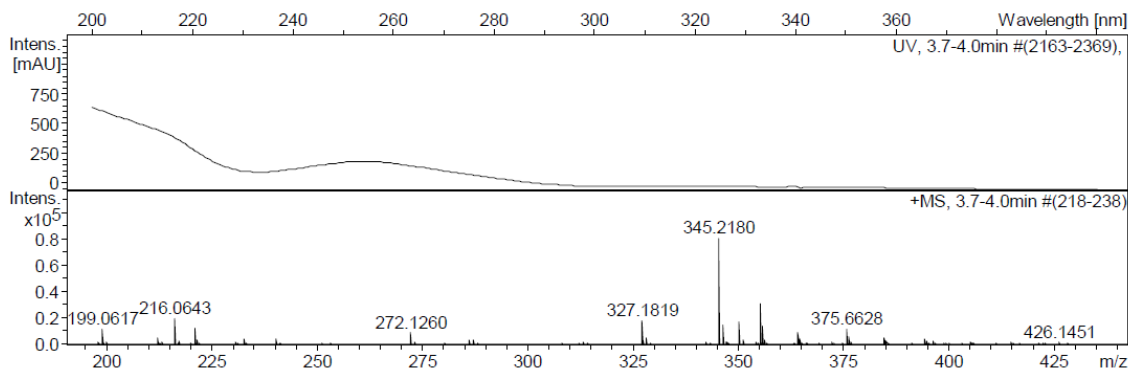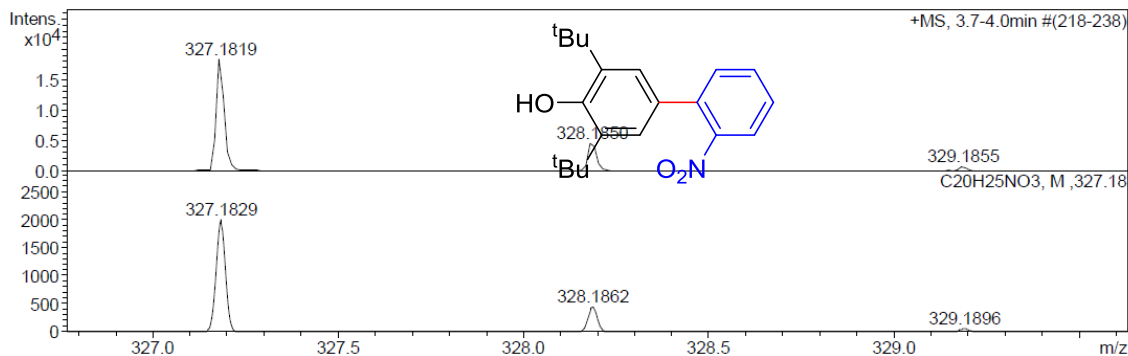

# Display Report

## Analysis Info

Analysis Name D:\Data\user data\2014\APRIL\03 Apr\Dr.S.Kumar-AK-5-105.d  
Method tune\_low\_APCI.m  
Sample Name AK-5-105  
Comment

Acquisition Date 4/4/2014 2:40:48 AM  
Operator Amit  
Instrument micrOTOF-Q II 10330

## Acquisition Parameter

|             |            |                       |           |                  |           |
|-------------|------------|-----------------------|-----------|------------------|-----------|
| Source Type | APCI       | Ion Polarity          | Positive  | Set Nebulizer    | 2.5 Bar   |
| Focus       | Not active | Set Capillary         | 4500 V    | Set Dry Heater   | 200 °C    |
| Scan Begin  | 50 m/z     | Set End Plate Offset  | -500 V    | Set Dry Gas      | 4.0 l/min |
| Scan End    | 3000 m/z   | Set Collision Cell RF | 130.0 Vpp | Set Divert Valve | Waste     |

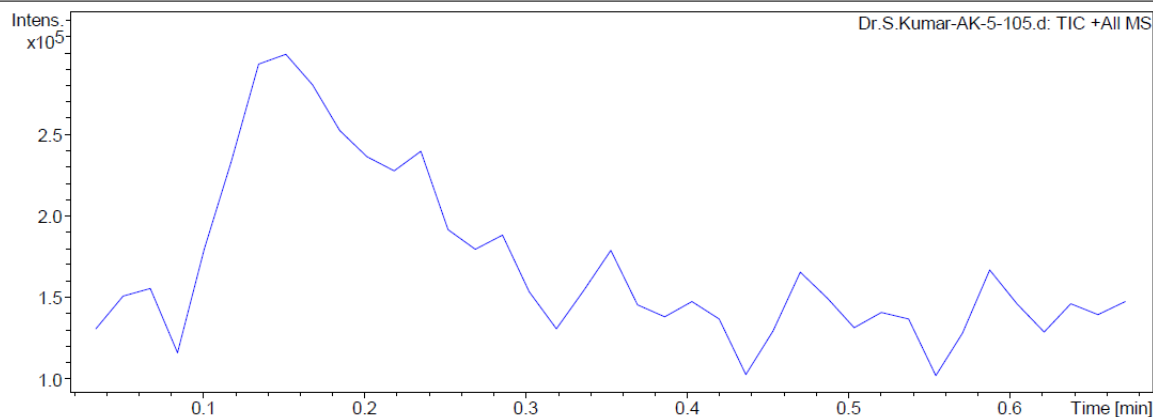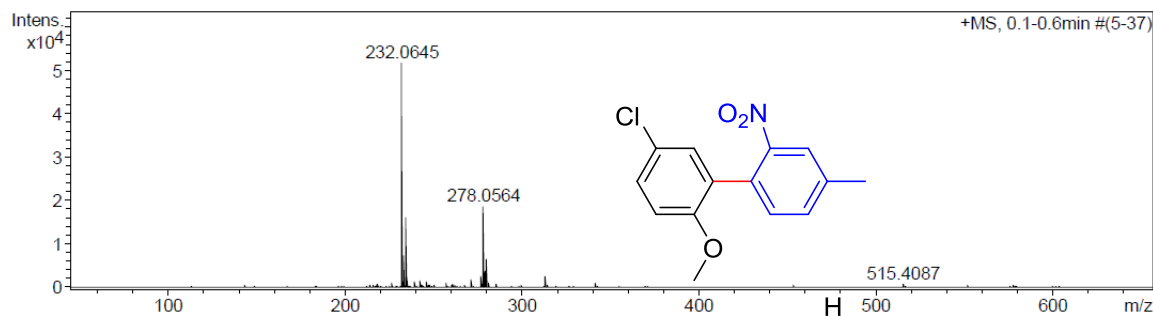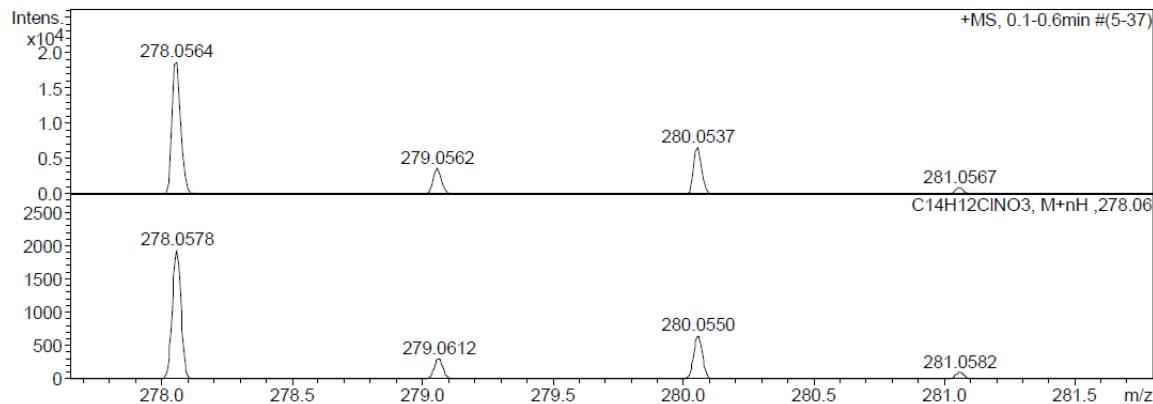

# Display Report

## Analysis Info

Analysis Name D:\Data\user data\2014\MARCH\27 mar\Dr.S.Kumar-AK-5-106-1.d  
Method tune\_low\_HPLC.m  
Sample Name AK-5-106  
Comment

Acquisition Date 3/27/2014 12:59:18 PM  
Operator Amit  
Instrument micrOTOF-Q II 10330

## Acquisition Parameter

|             |          |                       |           |                  |           |
|-------------|----------|-----------------------|-----------|------------------|-----------|
| Source Type | ESI      | Ion Polarity          | Positive  | Set Nebulizer    | 1.2 Bar   |
| Focus       | Active   | Set Capillary         | 4600 V    | Set Dry Heater   | 200 °C    |
| Scan Begin  | 50 m/z   | Set End Plate Offset  | -500 V    | Set Dry Gas      | 7.0 l/min |
| Scan End    | 3000 m/z | Set Collision Cell RF | 130.0 Vpp | Set Divert Valve | Waste     |

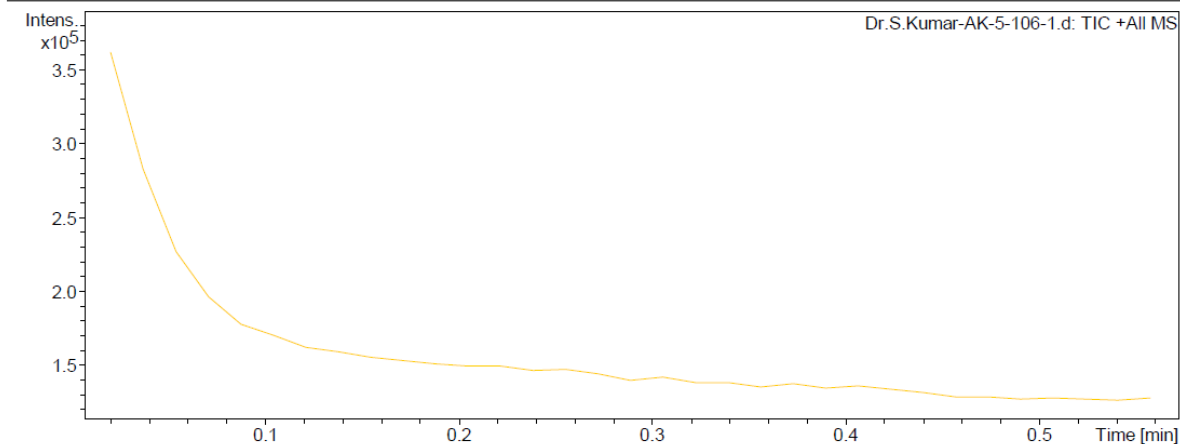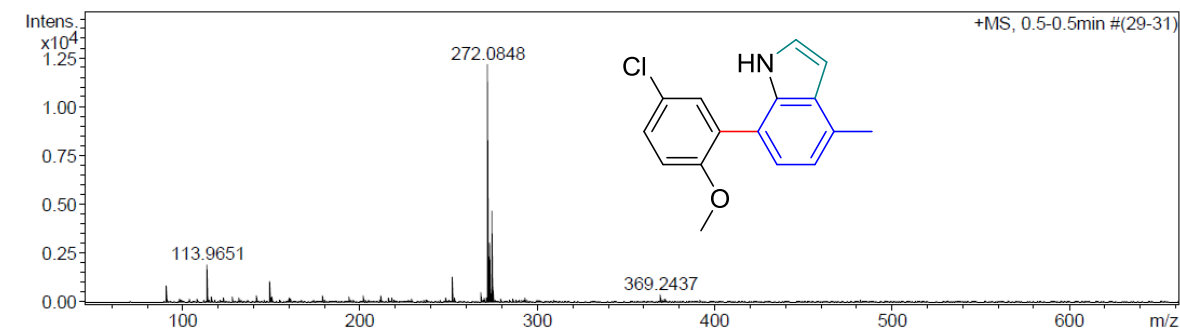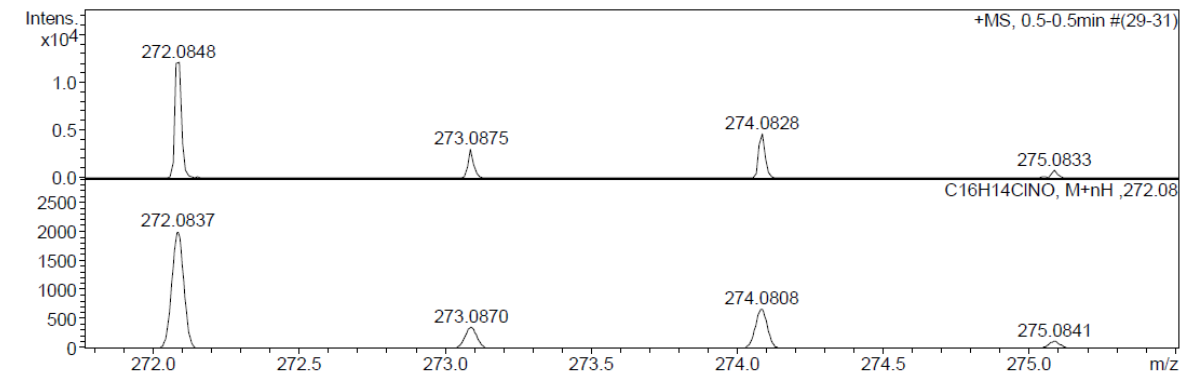



# Display Report

## Analysis Info

Analysis Name D:\Data\user data\2014\JAN\21 JAN\Dr.S.Kumar-AK-5-63\_1-A,2\_01\_1702.d  
Method HRLCMS-20 Sept.m  
Sample Name Dr.S.Kumar-AK-5-63  
Comment

Acquisition Date 1/21/2014 3:58:32 PM

Operator Amit  
Instrument micrOTOF-Q II 10330

## Acquisition Parameter

|             |          |                       |           |                  |           |
|-------------|----------|-----------------------|-----------|------------------|-----------|
| Source Type | ESI      | Ion Polarity          | Positive  | Set Nebulizer    | 1.2 Bar   |
| Focus       | Active   | Set Capillary         | 4500 V    | Set Dry Heater   | 200 °C    |
| Scan Begin  | 50 m/z   | Set End Plate Offset  | -500 V    | Set Dry Gas      | 7.0 l/min |
| Scan End    | 3000 m/z | Set Collision Cell RF | 130.0 Vpp | Set Divert Valve | Waste     |

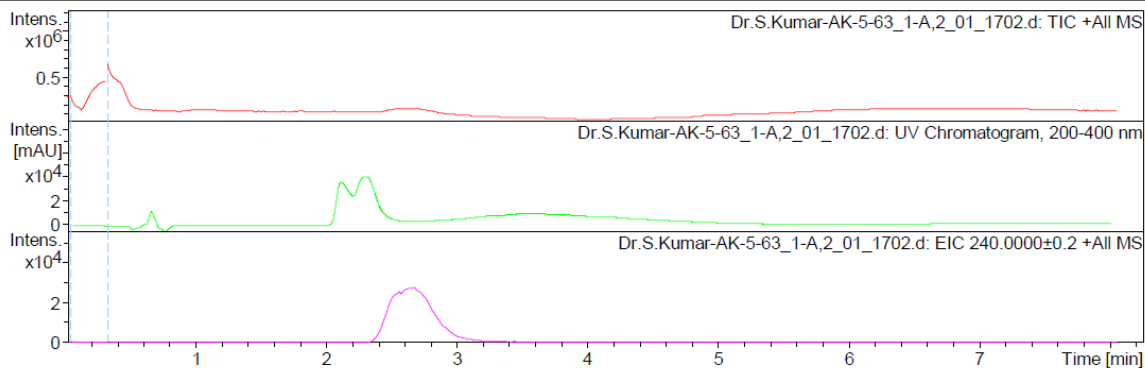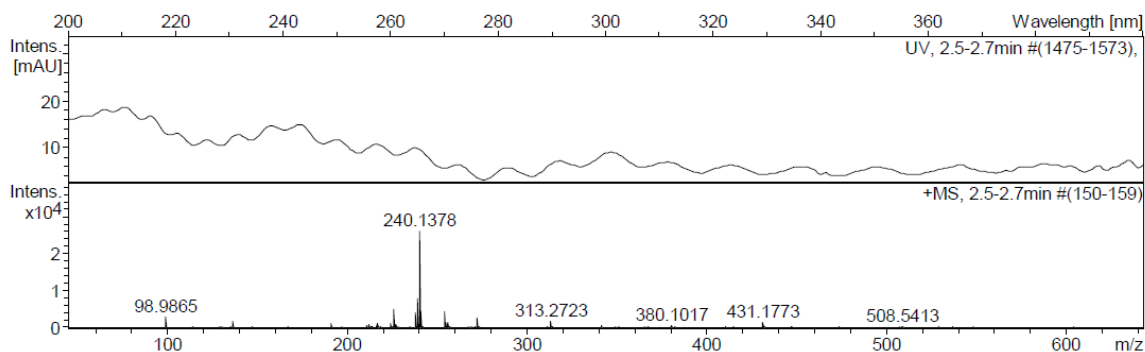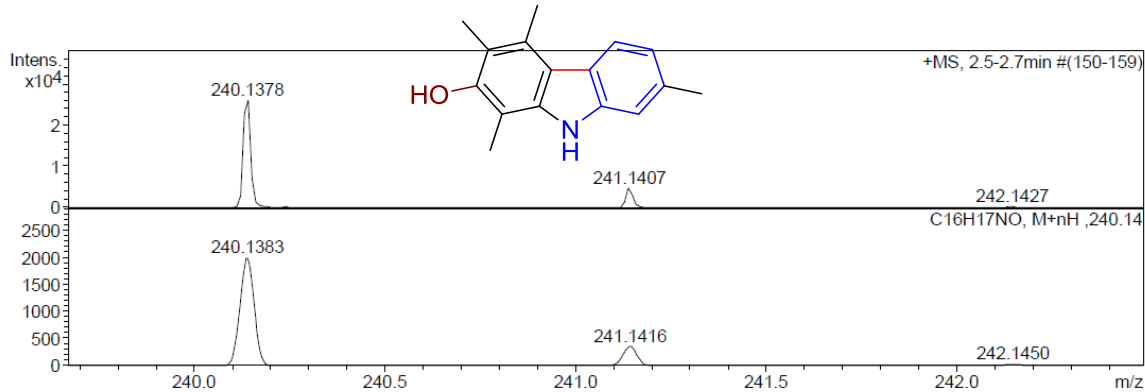

# Display Report

## Analysis Info

Analysis Name D:\Data\user data\2014\MARCH\18 MAR\Dr.Sangit-AK-5-115\_1-B,1\_01\_2117.d  
Method HRLCMS-20 Sept.m  
Sample Name Dr.Sangit-AK-5-115  
Comment

Acquisition Date 3/18/2014 1:25:56 PM  
Operator Amit  
Instrument micrOTOF-Q II 10330

## Acquisition Parameter

|             |          |                       |           |                  |           |
|-------------|----------|-----------------------|-----------|------------------|-----------|
| Source Type | ESI      | Ion Polarity          | Positive  | Set Nebulizer    | 1.2 Bar   |
| Focus       | Active   | Set Capillary         | 4500 V    | Set Dry Heater   | 200 °C    |
| Scan Begin  | 50 m/z   | Set End Plate Offset  | -500 V    | Set Dry Gas      | 7.0 l/min |
| Scan End    | 3000 m/z | Set Collision Cell RF | 130.0 Vpp | Set Divert Valve | Waste     |

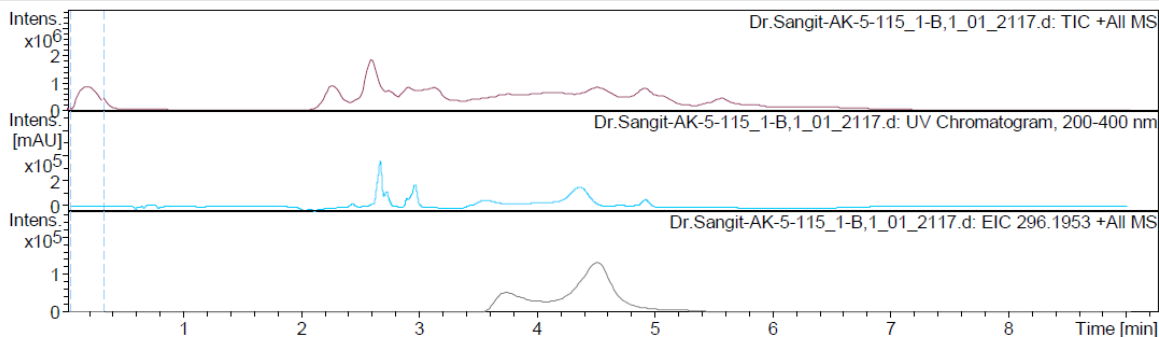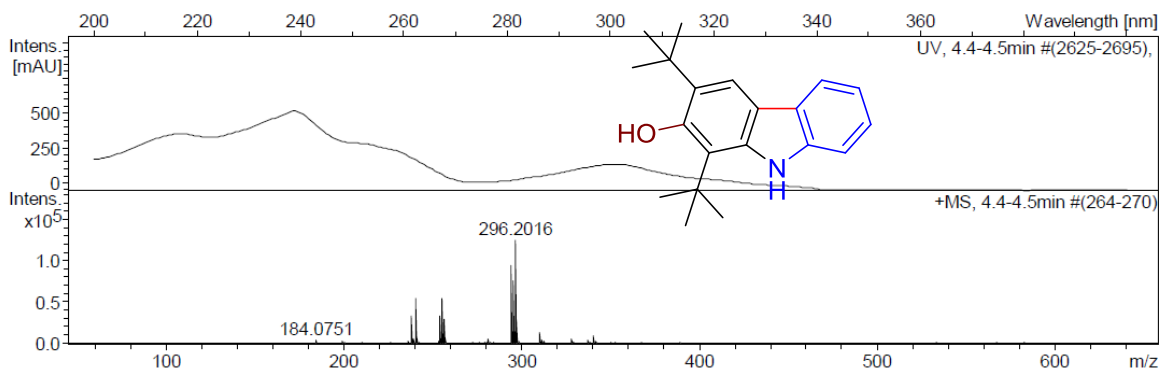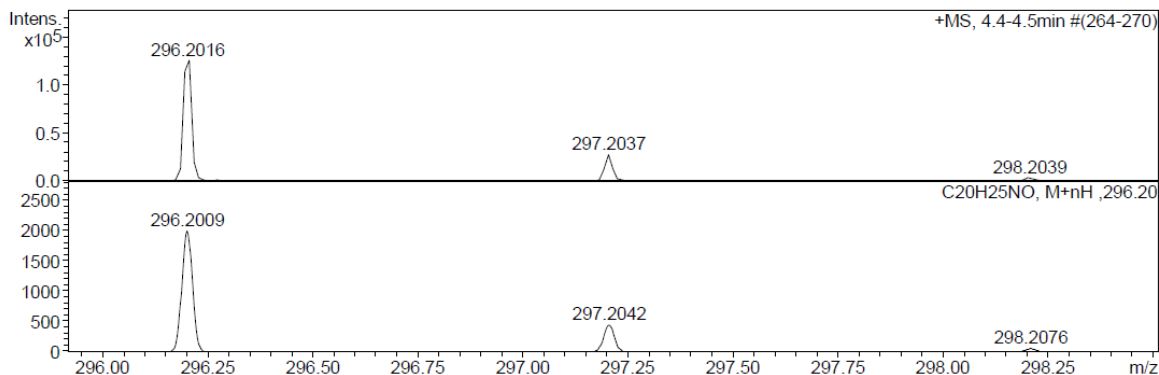

Supplement: c4cc03090g1.pdf [file c4cc03090g1.pdf]
